# Supplementary material for: Evaluating metabarcoding to analyse diet composition of species foraging in anthropogenic landscapes using Ion Torrent and Illumina sequencing
Source: PubMed Central journal article supplement (PMC6244006; doi:10.1038/s41598-018-34430-7), 2018-11-20
Supplement: 41598_2018_34430_MOESM1_ESM.pdf [file 41598_2018_34430_MOESM1_ESM.pdf]

Evaluating metabarcoding to analyse diet composition of species foraging in anthropogenic landscapes using Ion Torrent and Illumina sequencing

M.-A. Forin-Wiart, M.-L. Poulle, S. Piry, F. Cosson, C. Larose and M. Galan.

**Supplementary Table S1: Details on the calibration study**

Detailed composition of the daily rations distributed during two sessions to the housebound cat, the collected faecal samples and food item detection [not detected (-) or one replicate (one) or two replicates (two)] per food category and HTS platform (Ion PGM and MiSeq runs).

| Sessions | Days | Daily composition |          |                   | Faecal samples | DNA metabarcoding detections |       |          |       |                   |       |  |
|----------|------|-------------------|----------|-------------------|----------------|------------------------------|-------|----------|-------|-------------------|-------|--|
|          |      | Prey items        | Pet food | Surplus meat/fish |                | Prey items                   |       | Pet food |       | Surplus meat/fish |       |  |
|          |      |                   |          |                   |                | Ion PGM                      | MiSeq | Ion PGM  | MiSeq | Ion PGM           | MiSeq |  |
| 1        | 1    |                   | x        |                   |                |                              |       |          |       |                   |       |  |
|          | 2    |                   | x        |                   |                |                              |       |          |       |                   |       |  |
|          | 3    | x                 | x        |                   |                |                              |       |          |       |                   |       |  |
|          | 4    | x                 | x        |                   | 1              | -                            | -     | -        | two   |                   |       |  |
|          | 5    | x                 | x        |                   | 2              | two                          | two   | -        | -     |                   |       |  |
|          | 6    | x                 | x        |                   |                |                              |       |          |       |                   |       |  |
|          | 7    | x                 | x        |                   | 3              | two                          | two   | -        | -     |                   |       |  |
|          | 8    | x                 |          |                   | 4              | two                          | two   | -        | -     |                   |       |  |
|          | 9    |                   | x        |                   | 5              | one                          | two   | -        | -     |                   |       |  |
|          | 10   |                   | x        |                   |                |                              |       |          |       |                   |       |  |
|          | 11   |                   | x        |                   | 6              | -                            | two   | -        | one   |                   |       |  |
|          | 12   |                   |          | x                 |                |                              |       |          |       |                   |       |  |
|          | 13   |                   |          | x                 | 7              |                              |       | one      | two   |                   |       |  |
|          | 14   |                   |          | x                 | 8              |                              |       | one      | two   |                   |       |  |
|          | 15-1 |                   |          | x                 | 9              |                              |       | -        | two   |                   |       |  |
|          | 15-2 |                   |          | x                 | 10             |                              |       | one      | two   |                   |       |  |
|          | 16   |                   |          | x                 | 11             |                              |       | one      | -     |                   |       |  |
|          | 17   |                   |          | x                 | 12             |                              |       | -        | two   |                   |       |  |
|          | 18   |                   |          | x                 | 13             |                              |       | two      | one   |                   |       |  |
|          | 19   |                   |          | x                 | 14             |                              |       | -        | one   |                   |       |  |
|          | 20   |                   |          | x                 | 15             |                              |       | -        | two   |                   |       |  |
|          | 21   |                   |          | x                 | 16             |                              |       | one      | one   |                   |       |  |
| 22       |      |                   | x        | 17                |                |                              | -     | -        |       |                   |       |  |

Supplementary Table S1 (Continued)

| Sessions | Days | Daily composition |          |                   | Faecal samples | DNA metabarcoding detections |       |          |       |                   |          |
|----------|------|-------------------|----------|-------------------|----------------|------------------------------|-------|----------|-------|-------------------|----------|
|          |      | Prey items        | Pet food | Surplus meat/fish |                | Prey items                   |       | Pet food |       | Surplus meat/fish |          |
|          |      |                   |          |                   |                | Ion PGM                      | MiSeq | Ion PGM  | MiSeq | Ion PGM           | MiSeq    |
| 2        | 1    |                   | x        |                   |                |                              |       |          |       |                   |          |
|          | 2    |                   | x        | x                 |                |                              |       |          |       |                   |          |
|          | 3    |                   | x        | x                 | 18             |                              |       | -        | one   | -                 | -        |
|          | 4    |                   | x        | x                 |                |                              |       |          |       |                   |          |
|          | 5    |                   | x        | x                 |                |                              |       |          |       |                   |          |
|          | 6    |                   | x        | x                 | 19             |                              |       | -        | -     | -                 | -        |
|          | 7    |                   | x        | x                 | 20             |                              |       | -        | two   | -                 | two/one* |
|          | 8    |                   | x        | x                 |                |                              |       |          |       |                   |          |
|          | 9    |                   | x        |                   |                |                              |       |          |       |                   |          |
|          | 10   |                   | x        |                   | 21             |                              |       | one      | two   | -                 | two      |
|          | 11   |                   | x        | x                 |                |                              |       |          |       |                   |          |
|          | 12   | x                 | x        |                   | 22             |                              |       | one      | one   | one               | -        |
|          | 13   | x                 | x        |                   | 23             |                              |       | -        | -     |                   |          |
|          | 14   |                   | x        |                   | 24             | -                            | two   | -        | -     |                   |          |
|          | 15   |                   | x        |                   | 25             | -                            | two   | -        | -     |                   |          |
|          | 16-1 |                   | x        |                   | 26             |                              |       | -        | -     |                   |          |
|          | 16-2 |                   | x        |                   | 27             |                              |       | -        | one   |                   |          |
|          | 17   | x                 | x        |                   | 28             |                              |       | -        | -     |                   |          |
|          | 18   |                   | x        |                   | 29             | -                            | two   | -        | -     |                   |          |
|          | 19   |                   | x        | x                 | 30             |                              |       | -        | -     |                   |          |
|          | 20   |                   | x        |                   | 31             |                              |       | -        | -     | -                 | -        |
|          | 21   |                   | x        |                   | 32             |                              |       | -        | -     |                   |          |
| 22-1     |      | x                 |          | 33                |                |                              | -     | -        |       |                   |          |
| 22-2     |      | x                 |          | 34                |                |                              | -     | one      |       |                   |          |

**Supplementary Table S1 (Continued)**

| Sessions | Days | Daily composition |          |                   | Faecal samples | DNA metabarcoding detections |       |          |       |                   |       |
|----------|------|-------------------|----------|-------------------|----------------|------------------------------|-------|----------|-------|-------------------|-------|
|          |      | Prey items        | Pet food | Surplus meat/fish |                | Prey items                   |       | Pet food |       | Surplus meat/fish |       |
|          |      |                   |          |                   |                | Ion PGM                      | MiSeq | Ion PGM  | MiSeq | Ion PGM           | MiSeq |
|          | 23-1 |                   | x        |                   | 35             |                              |       | -        | -     |                   |       |
|          | 23-2 |                   | x        |                   | 36             |                              |       | -        | -     |                   |       |
|          | 24   |                   | x        |                   | 37             |                              |       | one      | -     |                   |       |
| 2        | 25-1 |                   | x        |                   | 38             |                              |       | -        | -     |                   |       |
|          | 25-2 |                   | x        |                   | 39             |                              |       | -        | -     |                   |       |
|          | 26   |                   | x        |                   | 40             |                              |       | -        | two   |                   |       |
|          | 27   |                   | x        |                   | 41             |                              |       | -        | -     |                   |       |

\* The one replicate occurrence was associated to surplus raw pig meat while the two replicates occurrence was associated to the surplus raw sheep meat.

### Supplementary Table S2: Detailed outputs from Ion PGM and MiSeq platforms during the field study.

Similarity thresholds used to identify variants and observed occurrences of food items in 326 field-collected faecal samples from free-ranging cats. Similarity thresholds and observed occurrences are shown according to the food item and the HTS platform.

| Taxa                     |                              |                             | Ion PGM run           |     |      |                     |                   |       | MiSeq run             |     |      |                     |                   |       |    |   |
|--------------------------|------------------------------|-----------------------------|-----------------------|-----|------|---------------------|-------------------|-------|-----------------------|-----|------|---------------------|-------------------|-------|----|---|
| Food category            | Food sub-category            | Food items                  | Similarity thresholds |     |      | Observed occurrence |                   |       | Similarity thresholds |     |      | Observed occurrence |                   |       |    |   |
|                          |                              |                             | 95%                   | 98% | 100% | in one replicate    | in two replicates | Total | 95%                   | 98% | 100% | in one replicate    | in two replicates | Total |    |   |
| Preys items              | small / medium-sized rodents | <i>Apodemus flavicollis</i> |                       |     | x    | 2                   | 2                 | 4     |                       |     |      | x                   | 2                 | 2     | 4  |   |
|                          |                              | <i>Apodemus sylvaticus</i>  |                       |     | x    | 0                   | 4                 | 4     |                       |     |      | x                   | 3                 | 2     | 5  |   |
|                          |                              | <i>Arvicola terrestris</i>  |                       |     | x    | 28                  | 47                | 75    |                       |     |      | x                   | 23                | 56    | 79 |   |
|                          |                              | <i>Micromys minutus</i>     |                       |     | x    | 0                   | 2                 | 2     |                       |     |      | x                   | 1                 | 2     | 3  |   |
|                          |                              | <i>Microtus arvalis</i>     |                       |     | x    | 38                  | 56                | 94    |                       |     |      | x                   | 60                | 29    | 89 |   |
|                          |                              | <i>Microtus agrestis</i>    |                       |     | x    | 7                   | 13                | 20    |                       |     |      | x                   | 15                | 12    | 27 |   |
|                          |                              | <i>Microtus spp.</i>        |                       |     | x    | 5                   | 3                 | 8     |                       |     |      | x                   | 1                 | 1     | 2  |   |
|                          |                              | <i>Mus musculus</i>         |                       |     | x    | 1                   | 0                 | 1     |                       |     |      | x                   | 1                 | 0     | 1  |   |
|                          |                              | <i>Myodes glareolus</i>     |                       |     | x    | 7                   | 6                 | 13    |                       |     |      | x                   | 8                 | 2     | 10 |   |
|                          |                              | <i>Rattus norvegicus</i>    |                       |     | -    | -                   | -                 | 0     | 0                     | 0   |      |                     |                   | x     | 3  | 2 |
|                          | <i>Rattus spp.</i>           |                             |                       | -   | -    | -                   | 0                 | 0     | 0                     |     |      |                     | x                 | 2     | 3  | 5 |
|                          | insectivores                 | <i>Crocidura leucodon</i>   |                       |     |      | x                   | 1                 | 0     | 1                     | -   | -    | -                   | 0                 | 0     | 0  |   |
|                          |                              | <i>Crocidura russula</i>    |                       |     |      | x                   | 0                 | 2     | 2                     |     |      |                     | x                 | 6     | 2  | 8 |
|                          |                              | <i>Sorex coronatus</i>      |                       |     |      | x                   | 0                 | 1     | 1                     |     |      |                     | x                 | 1     | 0  | 1 |
|                          | wild birds                   | <i>Carduelis carduelis</i>  |                       | -   | -    | -                   | 0                 | 0     | 0                     |     |      |                     | x                 | 1     | 1  | 2 |
|                          |                              | <i>Columba livia</i>        |                       |     |      | x                   | 1                 | 0     | 1                     |     |      |                     | x                 | 0     | 1  | 1 |
| <i>Columba palumbus</i>  |                              |                             |                       |     | x    | 0                   | 1                 | 1     |                       |     |      | x                   | 0                 | 1     | 1  |   |
| <i>Delichon urbicum</i>  |                              |                             | -                     | -   | -    | 0                   | 0                 | 0     |                       |     |      | x                   | 1                 | 0     | 1  |   |
| <i>Falco sp.</i>         |                              |                             |                       |     | x    | 0                   | 1                 | 1     |                       |     |      | x                   | 1                 | 1     | 2  |   |
| <i>Hirundo rustica</i>   |                              |                             |                       |     | x    | 1                   | 0                 | 1     |                       |     |      | x                   | 0                 | 2     | 2  |   |
| <i>Passer domesticus</i> |                              |                             | -                     | -   | -    | 0                   | 0                 | 0     |                       |     |      |                     | x                 | 1     | 0  | 1 |

Supplementary Table S2 (Continued)

| Taxa                       |                           |                                | Ion PGM run           |     |      |                     |                   |       | MiSeq run             |     |      |                     |                   |       |
|----------------------------|---------------------------|--------------------------------|-----------------------|-----|------|---------------------|-------------------|-------|-----------------------|-----|------|---------------------|-------------------|-------|
| Food category              | Food sub-category         | Food items                     | Similarity thresholds |     |      | Observed occurrence |                   |       | Similarity thresholds |     |      | Observed occurrence |                   |       |
|                            |                           |                                | 95%                   | 98% | 100% | in one replicate    | in two replicates | Total | 95%                   | 98% | 100% | in one replicate    | in two replicates | Total |
| <b>Preys items</b>         | <b>wild birds</b>         | <i>Passer montanus</i>         | -                     | -   | -    | 0                   | 0                 | 0     |                       |     | x    | 2                   | 0                 | 2     |
|                            |                           | <i>Passer spp.</i>             | -                     | -   | -    | 0                   | 0                 | 0     |                       |     | x    | 10                  | 7                 | 17    |
|                            |                           | <i>Pica pica</i>               | -                     | -   | -    | 0                   | 0                 | 0     |                       |     | x    | 1                   | 0                 | 1     |
|                            |                           | <i>Streptopelia decaocto</i>   | -                     | -   | -    | 0                   | 0                 | 0     |                       |     | x    | 3                   | 0                 | 3     |
|                            |                           | <i>Sylvia atricapilla</i>      | -                     | -   | -    | 0                   | 0                 | 0     |                       | x   |      | 1                   | 0                 | 1     |
|                            |                           | <i>Turdus philomelos</i>       |                       |     | x    | 0                   | 1                 | 1     | -                     | -   | -    | 0                   | 0                 | 0     |
|                            |                           | <i>Turdus pilaris</i>          |                       |     | x    | 1                   | 0                 | 1     |                       |     | x    | 2                   | 0                 | 2     |
| <b>reptiles</b>            |                           | <i>Anguis fragilis</i>         | -                     | -   | -    | 0                   | 0                 | 0     |                       |     | x    | 1                   | 0                 | 1     |
|                            |                           | <i>Capreolus capreolus</i>     |                       |     | x    | 1                   | 1                 | 2     |                       | x   |      | 1                   | 1                 | 2     |
| <b>game species</b>        |                           | <i>Cervus elaphus</i>          | -                     | -   | -    | 0                   | 0                 | 0     |                       | x   |      | 1                   | 0                 | 1     |
|                            |                           | Perdicinae*                    | -                     | -   | -    | 0                   | 0                 | 0     |                       |     | x    | 3                   | 3                 | 6     |
|                            |                           | <i>Oryctolagus cuniculus</i> * |                       |     | x    | 3                   | 0                 | 3     |                       |     | x    | 3                   | 2                 | 5     |
| <b>Human - linked food</b> | <b>anthropogenic food</b> | Acanthomorpha                  | x                     |     |      | 4                   | 0                 | 4     |                       | x   |      | 2                   | 1                 | 3     |
|                            |                           | <i>Anser sp.</i>               | -                     | -   | -    | 0                   | 0                 | 0     |                       | x   |      | 3                   | 0                 | 3     |
|                            |                           | Anseriformes                   | -                     | -   | -    | 0                   | 0                 | 0     |                       | x   |      | 9                   | 3                 | 12    |
|                            |                           | <i>Bos frontalis</i>           |                       | x   |      | 1                   | 0                 | 1     | -                     | -   | -    | 0                   | 0                 | 0     |
|                            |                           | <i>Bos indicus</i>             |                       | x   |      | 1                   | 2                 | 3     |                       | x   |      | 4                   | 0                 | 4     |
|                            |                           | <i>Bos sp.</i>                 |                       | x   |      | 60                  | 34                | 94    |                       | x   |      | 46                  | 40                | 86    |
|                            |                           | <i>Bos taurus</i>              |                       | x   |      | 3                   | 1                 | 4     |                       | x   |      | 4                   | 1                 | 5     |
|                            |                           | <i>Cairina moschata</i>        |                       | x   |      | 17                  | 7                 | 24    |                       | x   |      | 14                  | 4                 | 18    |
|                            |                           | <i>Capra sp.</i>               |                       | x   |      | 0                   | 1                 | 1     | x                     |     |      | 1                   | 0                 | 1     |
|                            |                           | Caprinae                       | x                     |     |      | 1                   | 0                 | 1     | x                     |     |      | 18                  | 5                 | 23    |
| <i>Clupea harengus</i>     |                           | x                              |                       | 1   | 0    | 1                   | -                 | -     | -                     | 0   | 0    | 0                   |                   |       |

Supplementary Table S2 (Continued)

| Taxa            |                      |                                 | Ion PGM run           |     |      |                     |                   |       | MiSeq run             |     |      |                     |                   |       |
|-----------------|----------------------|---------------------------------|-----------------------|-----|------|---------------------|-------------------|-------|-----------------------|-----|------|---------------------|-------------------|-------|
| Food category   | Food sub-category    | Food items                      | Similarity thresholds |     |      | Observed occurrence |                   |       | Similarity thresholds |     |      | Observed occurrence |                   |       |
|                 |                      |                                 | 95%                   | 98% | 100% | in one replicate    | in two replicates | Total | 95%                   | 98% | 100% | in one replicate    | in two replicates | Total |
|                 |                      | <i>Clupea sp.</i>               | -                     | -   | -    | 0                   | 0                 | 0     |                       | x   |      | 1                   | 0                 | 1     |
|                 |                      | <i>Equus sp.</i>                | x                     |     |      | 1                   | 0                 | 1     | -                     | -   | -    | 0                   | 0                 | 0     |
|                 |                      | <i>Esox lucius</i>              |                       | x   |      | 1                   | 0                 | 1     | -                     | -   | -    | 0                   | 0                 | 0     |
|                 |                      | <i>Gallus gallus domesticus</i> | -                     | -   | -    | 0                   | 0                 | 0     | x                     |     |      | 1                   | 0                 | 1     |
|                 |                      | <i>Gallus sp.</i>               | -                     | -   | -    | 0                   | 0                 | 0     |                       | x   |      | 43                  | 34                | 77    |
|                 |                      | <i>Katsuwonus pelamis</i>       |                       | x   |      | 2                   | 0                 | 2     | -                     | -   | -    | 0                   | 0                 | 0     |
|                 |                      | <i>Meleagris gallopavo</i>      |                       | x   |      | 4                   | 1                 | 5     |                       | x   |      | 25                  | 14                | 39    |
|                 |                      | <i>Merlangius merlangus</i>     |                       | x   |      | 1                   | 0                 | 1     | -                     | -   | -    | 0                   | 0                 | 0     |
| <b>Human</b>    | <b>anthropogenic</b> | Neognathae - Galloanserae       | -                     | -   | -    | 0                   | 0                 | 0     | x                     |     |      | 33                  | 21                | 54    |
| <b>- linked</b> | <b>food</b>          | <i>Numida meleagris</i>         | -                     | -   | -    | 0                   | 0                 | 0     |                       | x   |      | 8                   | 2                 | 10    |
|                 |                      | <i>Ovis aries</i>               |                       | x   |      | 2                   | 2                 | 4     | x                     |     |      | 0                   | 1                 | 1     |
|                 |                      | <i>Ovis sp.</i>                 |                       | x   |      | 8                   | 0                 | 8     |                       | x   |      | 18                  | 4                 | 22    |
|                 |                      | Percomorpha                     | -                     | -   | -    | 0                   | 0                 | 0     | x                     |     |      | 1                   | 0                 | 1     |
|                 |                      | <i>Salmo salar</i>              |                       | x   |      | 2                   | 2                 | 4     |                       | x   |      | 3                   | 1                 | 4     |
|                 |                      | Suidae                          | -                     | -   | -    | 0                   | 0                 | 0     |                       | x   |      | 8                   | 0                 | 8     |
|                 |                      | <i>Sus scrofa domesticus</i>    |                       | x   |      | 8                   | 3                 | 11    |                       | x   |      | 31                  | 19                | 50    |
|                 |                      | <i>Sus sp.</i>                  | -                     | -   | -    | 0                   | 0                 | 0     |                       | x   |      | 15                  | 1                 | 16    |
|                 |                      | <i>Thunnus sp.</i>              | -                     | -   | -    | 0                   | 0                 | 0     |                       | x   |      | 1                   | 0                 | 1     |

\* Only available from pet food or human leftovers (rabbit hutches and hunting scraps) for cats in this area.

### Supplementary Table S3: Variables used in analyses.

Variables used in the evaluation of HTS platforms efficiency for the food item detection.

| <b>Explanatory variables</b> | <b>Type</b> | <b>Description</b>                                                                                                                                                                                                                                                                                                                                                                                  |
|------------------------------|-------------|-----------------------------------------------------------------------------------------------------------------------------------------------------------------------------------------------------------------------------------------------------------------------------------------------------------------------------------------------------------------------------------------------------|
| fPlatform                    | Categorical | HTS platforms used: (1) Ion PGM; (2) Illumina MiSeq                                                                                                                                                                                                                                                                                                                                                 |
| fFoodItem                    | Categorical | Food item categories: (1) Human-linked food (HLF); (2) Water vole (WV); (3) Field vole (FV); (4) Common vole (CV); (5) Microtus-like vole (MLV); (6) Murids (harvest mouse, yellow-necked mouse, forest mouse, house mouse, rats <i>Rattus spp.</i> and Norway rats); (7) Bank vole (BV); (8) Birds (Falconiformes, Columbiformes and Passeriformes, BIR); (9) Shrews ( <i>Soricidae spp.</i> , SH) |
| fSample                      | Categorical | Number code identifying field-collected faecal samples individually                                                                                                                                                                                                                                                                                                                                 |
| <b>Response variables</b>    | <b>Type</b> | <b>Description</b>                                                                                                                                                                                                                                                                                                                                                                                  |
| Occurrence                   | Binary      | Food item successfully (1) or unsuccessfully (2) detected                                                                                                                                                                                                                                                                                                                                           |

**Supplementary Table S4: Modelling outputs.**

Models explaining the probability of detecting a food item in field-collected faeces of free-ranging cats.

| <b>Rank</b> | <b>Model description</b>                    | <b>K</b> | <b>LL</b> | <b>AIC</b> | <b><math>\Delta</math>AIC</b> |
|-------------|---------------------------------------------|----------|-----------|------------|-------------------------------|
| 1           | fPlatform+ fFoodItem+ fPlatform : fFoodItem | 18       | -435.0    | 906.8      | 0.00                          |
| 2           | fPlatform + fFoodItem                       | 10       | -473.6    | 967.4      | 60.6                          |
| 3           | fFoodItem                                   | 9        | -507.1    | 1032.4     | 125.6                         |
| 4           | Null                                        | 1        | -526.0    | 1054.0     | 147.2                         |

**Supplementary Table S5: List of prey items and surplus products given to the cat during the calibration study**

| Sessions | Days | Daily composition                                     |          |                   |
|----------|------|-------------------------------------------------------|----------|-------------------|
|          |      | Prey items                                            | Pet food | Surplus meat/fish |
| 1        | 1    |                                                       | x        |                   |
|          | 2    |                                                       | x        |                   |
|          | 3    | 1 <i>Arvicola terrestris</i>                          | x        |                   |
|          | 4    | 1 <i>Arvicola terrestris</i><br>1 <i>Apodemus sp.</i> | x        |                   |
|          | 5    | 1 <i>Arvicola terrestris</i>                          | x        |                   |
|          | 6    | 3 <i>Microtus agrestis</i>                            | x        |                   |
|          | 7    | 1 <i>Apodemus sp.</i><br>1 <i>Mus musculus</i>        | x        |                   |
|          | 8    | 1 <i>Rattus rattus</i>                                |          |                   |
|          | 9    |                                                       | x        |                   |
|          | 10   |                                                       | x        |                   |
|          | 11   |                                                       | x        |                   |
|          | 12   |                                                       | x        |                   |
|          | 13   |                                                       | x        |                   |
|          | 14   |                                                       | x        |                   |
|          | 15-1 |                                                       | x        |                   |
|          | 15-2 |                                                       | x        |                   |
|          | 16   |                                                       | x        |                   |
|          | 17   |                                                       | x        |                   |
|          | 18   |                                                       | x        |                   |
|          | 19   |                                                       | x        |                   |
|          | 20   |                                                       | x        |                   |
|          | 21   |                                                       | x        |                   |
| 22       |      | x                                                     |          |                   |
| 2        | 1    |                                                       | x        |                   |
|          | 2    |                                                       | x        | herring           |
|          | 3    |                                                       | x        | chicken           |
|          | 4    |                                                       | x        | cod<br>lamb       |
|          | 5    |                                                       | x        | dogfish<br>pork   |
|          | 6    |                                                       | x        | plaice<br>veal    |
|          | 7    |                                                       | x        | duck<br>beef      |
|          | 8    |                                                       | x        | pork<br>beef      |

**Supplementary Table S5** (continued)

| Sessions | Days | Daily composition            |          |                   |
|----------|------|------------------------------|----------|-------------------|
|          |      | Prey items                   | Pet food | Surplus meat/fish |
|          | 9    |                              | x        |                   |
|          | 10   |                              | x        |                   |
|          | 11   |                              | x        | duck              |
|          | 12   | 1 <i>Taeniopygia guttata</i> | x        |                   |
|          | 13   | 1 <i>Taeniopygia guttata</i> | x        |                   |
|          | 14   |                              | x        |                   |
|          | 15   |                              | x        |                   |
|          | 16-1 |                              | x        |                   |
|          | 16-2 |                              | x        |                   |
|          | 17   | 1 <i>Mus musculus</i>        | x        |                   |
|          | 18   |                              | x        |                   |
| 2        | 19   |                              | x        | wild boar         |
|          | 20   |                              | x        |                   |
|          | 21   |                              | x        |                   |
|          | 22-1 |                              | x        |                   |
|          | 22-2 |                              | x        |                   |
|          | 23-1 |                              | x        |                   |
|          | 23-2 |                              |          |                   |
|          | 24   |                              | x        |                   |
|          | 25-1 |                              | x        |                   |
|          | 25-2 |                              | x        |                   |
|          | 26   |                              | x        |                   |
|          | 27   |                              | x        |                   |
