# Supplementary material for: Evaluating metabarcoding to analyse diet composition of species foraging in anthropogenic landscapes using Ion Torrent and Illumina sequencing
Source: PubMed Central journal article supplement (PMC6244006; doi:10.1038/s41598-018-34430-7), 2018-11-20
Supplement: 41598_2018_34430_MOESM2_ESM.pdf [file 41598_2018_34430_MOESM2_ESM.pdf]

Evaluating metabarcoding to analyse diet composition of species foraging in anthropogenic landscapes using Ion Torrent and Illumina sequencing

M.-A. Forin-Wiart, M.-L. Poulle, S. Piry, F. Cosson, C. Larose and M. Galan.

| <b>GenBank Accession N°</b> | <b>Genus</b> | <b>species</b> | <b>subspecies</b> |
|-----------------------------|--------------|----------------|-------------------|
| AF159391.1                  | Apodemus     | alpicola       |                   |
| AB032854.1                  | Apodemus     | alpicola       |                   |
| AJ311152.1                  | Apodemus     | alpicola       |                   |
| AJ311153.1                  | Apodemus     | alpicola       |                   |
| AF159392.1                  | Apodemus     | flavicollis    |                   |
| AY158443.1                  | Apodemus     | flavicollis    |                   |
| AY158444.1                  | Apodemus     | flavicollis    |                   |
| AY158445.1                  | Apodemus     | flavicollis    |                   |
| AY158450.1                  | Apodemus     | flavicollis    |                   |
| AY158451.1                  | Apodemus     | flavicollis    |                   |
| AY158452.1                  | Apodemus     | flavicollis    |                   |
| AY158453.1                  | Apodemus     | flavicollis    |                   |
| AB032853.1                  | Apodemus     | flavicollis    |                   |
| AJ311150.1                  | Apodemus     | flavicollis    |                   |
| AJ311151.1                  | Apodemus     | flavicollis    |                   |
| AJ605644.1                  | Apodemus     | flavicollis    |                   |
| AJ605642.1                  | Apodemus     | flavicollis    |                   |
| AJ605643.1                  | Apodemus     | flavicollis    |                   |
| AJ605657.1                  | Apodemus     | flavicollis    |                   |
| AJ605661.1                  | Apodemus     | flavicollis    |                   |
| AJ605660.1                  | Apodemus     | flavicollis    |                   |
| AJ605691.1                  | Apodemus     | flavicollis    |                   |
| AJ605640.1                  | Apodemus     | flavicollis    |                   |
| AJ605600.1                  | Apodemus     | flavicollis    |                   |
| AJ605616.1                  | Apodemus     | flavicollis    |                   |
| AJ605629.1                  | Apodemus     | flavicollis    |                   |
| AJ605631.1                  | Apodemus     | flavicollis    |                   |
| AJ605633.1                  | Apodemus     | flavicollis    |                   |
| AJ605672.1                  | Apodemus     | flavicollis    |                   |
| AJ605667.1                  | Apodemus     | flavicollis    |                   |
| AJ605668.1                  | Apodemus     | flavicollis    |                   |
| AJ605676.1                  | Apodemus     | flavicollis    |                   |
| AJ605677.1                  | Apodemus     | flavicollis    |                   |
| AJ605688.1                  | Apodemus     | flavicollis    |                   |
| AJ605690.1                  | Apodemus     | flavicollis    |                   |
| AJ605605.1                  | Apodemus     | flavicollis    |                   |
| AJ605666.1                  | Apodemus     | flavicollis    |                   |
| AJ605652.1                  | Apodemus     | flavicollis    |                   |
| AJ605664.1                  | Apodemus     | flavicollis    |                   |
| AJ605663.1                  | Apodemus     | flavicollis    |                   |
| AJ605634.1                  | Apodemus     | flavicollis    |                   |
| AJ605601.1                  | Apodemus     | flavicollis    |                   |
| AJ605604.1                  | Apodemus     | flavicollis    |                   |

|            |          |             |  |
|------------|----------|-------------|--|
| AJ605665.1 | Apodemus | flavicollis |  |
| AJ605641.1 | Apodemus | flavicollis |  |
| AJ605610.1 | Apodemus | flavicollis |  |
| AJ605609.1 | Apodemus | flavicollis |  |
| AJ605606.1 | Apodemus | flavicollis |  |
| AJ605608.1 | Apodemus | flavicollis |  |
| AJ605614.1 | Apodemus | flavicollis |  |
| AJ605651.1 | Apodemus | flavicollis |  |
| AJ605650.1 | Apodemus | flavicollis |  |
| AJ605656.1 | Apodemus | flavicollis |  |
| AJ605625.1 | Apodemus | flavicollis |  |
| AJ605624.1 | Apodemus | flavicollis |  |
| AJ605646.1 | Apodemus | flavicollis |  |
| AJ605647.1 | Apodemus | flavicollis |  |
| AJ605622.1 | Apodemus | flavicollis |  |
| AJ605621.1 | Apodemus | flavicollis |  |
| AJ605620.1 | Apodemus | flavicollis |  |
| AJ605619.1 | Apodemus | flavicollis |  |
| AJ605618.1 | Apodemus | flavicollis |  |
| AJ605617.1 | Apodemus | flavicollis |  |
| AJ605686.1 | Apodemus | flavicollis |  |
| AJ298604.1 | Apodemus | flavicollis |  |
| AJ298603.1 | Apodemus | flavicollis |  |
| AJ298601.1 | Apodemus | flavicollis |  |
| AJ298602.1 | Apodemus | flavicollis |  |
| AF159395.1 | Apodemus | sylvaticus  |  |
| AF429819.1 | Apodemus | sylvaticus  |  |
| AF429820.1 | Apodemus | sylvaticus  |  |
| HQ158102.1 | Apodemus | sylvaticus  |  |
| AY158456.1 | Apodemus | sylvaticus  |  |
| AY158461.1 | Apodemus | sylvaticus  |  |
| AB033695.1 | Apodemus | sylvaticus  |  |
| AJ311149.1 | Apodemus | sylvaticus  |  |
| AJ311148.1 | Apodemus | sylvaticus  |  |
| AJ511903.1 | Apodemus | sylvaticus  |  |
| AJ511881.1 | Apodemus | sylvaticus  |  |
| AJ511902.1 | Apodemus | sylvaticus  |  |
| AJ511923.1 | Apodemus | sylvaticus  |  |
| AJ511942.1 | Apodemus | sylvaticus  |  |
| AJ511943.1 | Apodemus | sylvaticus  |  |
| AJ511936.1 | Apodemus | sylvaticus  |  |
| AJ511938.1 | Apodemus | sylvaticus  |  |
| AJ511922.1 | Apodemus | sylvaticus  |  |
| AJ511921.1 | Apodemus | sylvaticus  |  |

|            |          |               |  |
|------------|----------|---------------|--|
| AJ511916.1 | Apodemus | sylvaticus    |  |
| AJ511946.1 | Apodemus | sylvaticus    |  |
| AJ511945.1 | Apodemus | sylvaticus    |  |
| AJ511905.1 | Apodemus | sylvaticus    |  |
| AJ511885.1 | Apodemus | sylvaticus    |  |
| AJ511901.1 | Apodemus | sylvaticus    |  |
| AJ511908.1 | Apodemus | sylvaticus    |  |
| AJ511899.1 | Apodemus | sylvaticus    |  |
| AJ511891.1 | Apodemus | sylvaticus    |  |
| AJ511911.1 | Apodemus | sylvaticus    |  |
| AJ511912.1 | Apodemus | sylvaticus    |  |
| AJ511910.1 | Apodemus | sylvaticus    |  |
| AJ511948.1 | Apodemus | sylvaticus    |  |
| AJ511949.1 | Apodemus | sylvaticus    |  |
| AJ511950.1 | Apodemus | sylvaticus    |  |
| AJ511962.1 | Apodemus | sylvaticus    |  |
| AJ511963.1 | Apodemus | sylvaticus    |  |
| AJ511964.1 | Apodemus | sylvaticus    |  |
| AJ511965.1 | Apodemus | sylvaticus    |  |
| AJ511966.1 | Apodemus | sylvaticus    |  |
| AJ511967.1 | Apodemus | sylvaticus    |  |
| AJ511951.1 | Apodemus | sylvaticus    |  |
| AJ511952.1 | Apodemus | sylvaticus    |  |
| AJ511954.1 | Apodemus | sylvaticus    |  |
| AJ511955.1 | Apodemus | sylvaticus    |  |
| AJ511957.1 | Apodemus | sylvaticus    |  |
| AJ511956.1 | Apodemus | sylvaticus    |  |
| AJ511968.1 | Apodemus | sylvaticus    |  |
| AJ511969.1 | Apodemus | sylvaticus    |  |
| AJ511971.1 | Apodemus | sylvaticus    |  |
| AJ511958.1 | Apodemus | sylvaticus    |  |
| AJ511972.1 | Apodemus | sylvaticus    |  |
| AJ511973.1 | Apodemus | sylvaticus    |  |
| AJ298598.1 | Apodemus | sylvaticus    |  |
| AJ298599.1 | Apodemus | sylvaticus    |  |
| AJ298600.1 | Apodemus | sylvaticus    |  |
| AY389021.1 | Apodemus | uralensis     |  |
| AB096837.1 | Apodemus | uralensis     |  |
| AJ311155.1 | Apodemus | uralensis     |  |
| AY324476.1 | Apomys   | camiguinensis |  |
| AY324477.1 | Apomys   | camiguinensis |  |
| AY324463.1 | Apomys   | datae         |  |
| AY324464.1 | Apomys   | datae         |  |
| AY324465.1 | Apomys   | gracilostriis |  |

|            |           |              |  |
|------------|-----------|--------------|--|
| AY324466.1 | Apomys    | gracilostris |  |
| EU349735.1 | Apomys    | hylocoetes   |  |
| AY324467.1 | Apomys    | hylocoetes   |  |
| AY324468.1 | Apomys    | hylocoetes   |  |
| AY324469.1 | Apomys    | hylocoetes   |  |
| DQ191467.1 | Apomys    | insignis     |  |
| AY324470.1 | Apomys    | insignis     |  |
| AY324471.1 | Apomys    | insignis     |  |
| AY324473.1 | Apomys    | insignis     |  |
| AY324472.1 | Apomys    | insignis     |  |
| DQ191468.1 | Apomys    | microdon     |  |
| AY324478.1 | Apomys    | microdon     |  |
| AY324479.1 | Apomys    | microdon     |  |
| AY324480.1 | Apomys    | microdon     |  |
| AY324481.1 | Apomys    | microdon     |  |
| DQ191469.1 | Apomys    | musculus     |  |
| AY324482.1 | Apomys    | musculus     |  |
| AY324484.1 | Apomys    | sp.          |  |
| AY324485.1 | Apomys    | sp.          |  |
| AY324486.1 | Apomys    | sp.          |  |
| AY324487.1 | Apomys    | sp.          |  |
| AY324488.1 | Apomys    | sp.          |  |
| AY324489.1 | Apomys    | sp.          |  |
| AY324475.1 | Apomys    | sp.          |  |
| AY324474.1 | Apomys    | sp.          |  |
| FJ539346.1 | Arvicola  | sapidus      |  |
| FJ539343.1 | Arvicola  | sapidus      |  |
| FJ539344.1 | Arvicola  | sapidus      |  |
| FJ539345.1 | Arvicola  | sapidus      |  |
| FJ539341.1 | Arvicola  | sapidus      |  |
| FJ539342.1 | Arvicola  | sapidus      |  |
| AF159400.1 | Arvicola  | terrestris   |  |
| AF119269.1 | Arvicola  | terrestris   |  |
| DQ663669.1 | Arvicola  | terrestris   |  |
| AY275106.1 | Arvicola  | terrestris   |  |
| GU954310.1 | Arvicola  | terrestris   |  |
| DQ088704.1 | Castor    | fiber        |  |
| DQ088708.1 | Castor    | fiber        |  |
| DQ088706.1 | Castor    | fiber        |  |
| DQ088705.1 | Castor    | fiber        |  |
| AJ389529.1 | Castor    | fiber        |  |
| DQ088707.1 | Castor    | fiber        |  |
| AY513845.1 | Chionomys | nivalis      |  |
| AY513846.1 | Chionomys | nivalis      |  |

|            |               |           |  |
|------------|---------------|-----------|--|
| AY513847.1 | Chionomys     | nivalis   |  |
| AY513848.1 | Chionomys     | nivalis   |  |
| AY513849.1 | Chionomys     | nivalis   |  |
| GQ150786.1 | Chionomys     | nivalis   |  |
| GQ150794.1 | Chionomys     | nivalis   |  |
| GQ150795.1 | Chionomys     | nivalis   |  |
| GQ150796.1 | Chionomys     | nivalis   |  |
| GQ150797.1 | Chionomys     | nivalis   |  |
| GQ150798.1 | Chionomys     | nivalis   |  |
| GQ150799.1 | Chionomys     | nivalis   |  |
| GQ150800.1 | Chionomys     | nivalis   |  |
| GQ150787.1 | Chionomys     | nivalis   |  |
| GQ150801.1 | Chionomys     | nivalis   |  |
| GQ150802.1 | Chionomys     | nivalis   |  |
| GQ150788.1 | Chionomys     | nivalis   |  |
| GQ150789.1 | Chionomys     | nivalis   |  |
| GQ150790.1 | Chionomys     | nivalis   |  |
| GQ150791.1 | Chionomys     | nivalis   |  |
| GQ150792.1 | Chionomys     | nivalis   |  |
| GQ150793.1 | Chionomys     | nivalis   |  |
| AM392367.1 | Chionomys     | nivalis   |  |
| AF159401.1 | Clethrionomys | glareolus |  |
| AF119272.1 | Clethrionomys | glareolus |  |
| DQ663670.1 | Clethrionomys | glareolus |  |
| DQ472232.1 | Clethrionomys | glareolus |  |
| DQ472233.1 | Clethrionomys | glareolus |  |
| DQ472234.1 | Clethrionomys | glareolus |  |
| DQ472235.1 | Clethrionomys | glareolus |  |
| DQ472236.1 | Clethrionomys | glareolus |  |
| DQ472237.1 | Clethrionomys | glareolus |  |
| DQ472238.1 | Clethrionomys | glareolus |  |
| DQ472239.1 | Clethrionomys | glareolus |  |
| DQ472240.1 | Clethrionomys | glareolus |  |
| DQ472241.1 | Clethrionomys | glareolus |  |
| DQ472346.1 | Clethrionomys | glareolus |  |
| DQ472347.1 | Clethrionomys | glareolus |  |
| DQ472348.1 | Clethrionomys | glareolus |  |
| DQ472230.1 | Clethrionomys | glareolus |  |
| DQ472231.1 | Clethrionomys | glareolus |  |
| DQ472242.1 | Clethrionomys | glareolus |  |
| DQ472243.1 | Clethrionomys | glareolus |  |
| DQ472244.1 | Clethrionomys | glareolus |  |
| DQ472245.1 | Clethrionomys | glareolus |  |
| DQ472246.1 | Clethrionomys | glareolus |  |

|            |               |           |  |
|------------|---------------|-----------|--|
| DQ472247.1 | Clethrionomys | glareolus |  |
| DQ472248.1 | Clethrionomys | glareolus |  |
| DQ472249.1 | Clethrionomys | glareolus |  |
| DQ472250.1 | Clethrionomys | glareolus |  |
| DQ472251.1 | Clethrionomys | glareolus |  |
| DQ472252.1 | Clethrionomys | glareolus |  |
| DQ472253.1 | Clethrionomys | glareolus |  |
| DQ472254.1 | Clethrionomys | glareolus |  |
| DQ472255.1 | Clethrionomys | glareolus |  |
| DQ472256.1 | Clethrionomys | glareolus |  |
| DQ472257.1 | Clethrionomys | glareolus |  |
| DQ472258.1 | Clethrionomys | glareolus |  |
| DQ472259.1 | Clethrionomys | glareolus |  |
| DQ472260.1 | Clethrionomys | glareolus |  |
| DQ472261.1 | Clethrionomys | glareolus |  |
| DQ472262.1 | Clethrionomys | glareolus |  |
| DQ472263.1 | Clethrionomys | glareolus |  |
| DQ472264.1 | Clethrionomys | glareolus |  |
| DQ472265.1 | Clethrionomys | glareolus |  |
| DQ472266.1 | Clethrionomys | glareolus |  |
| DQ472267.1 | Clethrionomys | glareolus |  |
| DQ472268.1 | Clethrionomys | glareolus |  |
| DQ472269.1 | Clethrionomys | glareolus |  |
| DQ472270.1 | Clethrionomys | glareolus |  |
| DQ472271.1 | Clethrionomys | glareolus |  |
| DQ472272.1 | Clethrionomys | glareolus |  |
| DQ472273.1 | Clethrionomys | glareolus |  |
| DQ472274.1 | Clethrionomys | glareolus |  |
| DQ472275.1 | Clethrionomys | glareolus |  |
| DQ472276.1 | Clethrionomys | glareolus |  |
| DQ472277.1 | Clethrionomys | glareolus |  |
| DQ472278.1 | Clethrionomys | glareolus |  |
| DQ472279.1 | Clethrionomys | glareolus |  |
| DQ472280.1 | Clethrionomys | glareolus |  |
| DQ472281.1 | Clethrionomys | glareolus |  |
| DQ472282.1 | Clethrionomys | glareolus |  |
| DQ472283.1 | Clethrionomys | glareolus |  |
| DQ472284.1 | Clethrionomys | glareolus |  |
| DQ472285.1 | Clethrionomys | glareolus |  |
| DQ472286.1 | Clethrionomys | glareolus |  |
| DQ472287.1 | Clethrionomys | glareolus |  |
| DQ472288.1 | Clethrionomys | glareolus |  |
| DQ472289.1 | Clethrionomys | glareolus |  |
| DQ472290.1 | Clethrionomys | glareolus |  |

|            |               |           |  |
|------------|---------------|-----------|--|
| DQ472291.1 | Clethrionomys | glareolus |  |
| DQ472292.1 | Clethrionomys | glareolus |  |
| DQ472293.1 | Clethrionomys | glareolus |  |
| DQ472294.1 | Clethrionomys | glareolus |  |
| DQ472295.1 | Clethrionomys | glareolus |  |
| DQ472296.1 | Clethrionomys | glareolus |  |
| DQ472297.1 | Clethrionomys | glareolus |  |
| DQ472298.1 | Clethrionomys | glareolus |  |
| DQ472299.1 | Clethrionomys | glareolus |  |
| DQ472300.1 | Clethrionomys | glareolus |  |
| DQ472301.1 | Clethrionomys | glareolus |  |
| DQ472302.1 | Clethrionomys | glareolus |  |
| DQ472303.1 | Clethrionomys | glareolus |  |
| DQ472304.1 | Clethrionomys | glareolus |  |
| DQ472305.1 | Clethrionomys | glareolus |  |
| DQ472306.1 | Clethrionomys | glareolus |  |
| DQ472307.1 | Clethrionomys | glareolus |  |
| DQ472308.1 | Clethrionomys | glareolus |  |
| DQ472309.1 | Clethrionomys | glareolus |  |
| DQ472310.1 | Clethrionomys | glareolus |  |
| DQ472311.1 | Clethrionomys | glareolus |  |
| DQ472312.1 | Clethrionomys | glareolus |  |
| DQ472313.1 | Clethrionomys | glareolus |  |
| DQ472314.1 | Clethrionomys | glareolus |  |
| DQ472315.1 | Clethrionomys | glareolus |  |
| DQ472316.1 | Clethrionomys | glareolus |  |
| DQ472317.1 | Clethrionomys | glareolus |  |
| DQ472318.1 | Clethrionomys | glareolus |  |
| DQ472319.1 | Clethrionomys | glareolus |  |
| DQ472320.1 | Clethrionomys | glareolus |  |
| DQ472321.1 | Clethrionomys | glareolus |  |
| DQ472322.1 | Clethrionomys | glareolus |  |
| DQ472323.1 | Clethrionomys | glareolus |  |
| DQ472324.1 | Clethrionomys | glareolus |  |
| DQ472325.1 | Clethrionomys | glareolus |  |
| DQ472326.1 | Clethrionomys | glareolus |  |
| DQ472327.1 | Clethrionomys | glareolus |  |
| DQ472328.1 | Clethrionomys | glareolus |  |
| DQ472329.1 | Clethrionomys | glareolus |  |
| DQ472330.1 | Clethrionomys | glareolus |  |
| DQ472331.1 | Clethrionomys | glareolus |  |
| DQ472332.1 | Clethrionomys | glareolus |  |
| DQ472333.1 | Clethrionomys | glareolus |  |
| DQ472334.1 | Clethrionomys | glareolus |  |

|            |               |           |  |
|------------|---------------|-----------|--|
| DQ472335.1 | Clethrionomys | glareolus |  |
| DQ472336.1 | Clethrionomys | glareolus |  |
| DQ472337.1 | Clethrionomys | glareolus |  |
| DQ472338.1 | Clethrionomys | glareolus |  |
| DQ472339.1 | Clethrionomys | glareolus |  |
| DQ472340.1 | Clethrionomys | glareolus |  |
| DQ472341.1 | Clethrionomys | glareolus |  |
| DQ472342.1 | Clethrionomys | glareolus |  |
| DQ472343.1 | Clethrionomys | glareolus |  |
| DQ472344.1 | Clethrionomys | glareolus |  |
| DQ472345.1 | Clethrionomys | glareolus |  |
| AF429812.1 | Clethrionomys | glareolus |  |
| AF429813.1 | Clethrionomys | glareolus |  |
| AY185800.1 | Clethrionomys | glareolus |  |
| AY185796.1 | Clethrionomys | glareolus |  |
| AY185798.1 | Clethrionomys | glareolus |  |
| AY062901.1 | Clethrionomys | glareolus |  |
| AY062902.1 | Clethrionomys | glareolus |  |
| AF367075.1 | Clethrionomys | glareolus |  |
| AY062903.1 | Clethrionomys | glareolus |  |
| AY062904.1 | Clethrionomys | glareolus |  |
| AF367080.1 | Clethrionomys | glareolus |  |
| AF367079.1 | Clethrionomys | glareolus |  |
| AF429810.1 | Clethrionomys | glareolus |  |
| AY062905.1 | Clethrionomys | glareolus |  |
| AF367076.1 | Clethrionomys | glareolus |  |
| AY062906.1 | Clethrionomys | glareolus |  |
| AF429781.1 | Clethrionomys | glareolus |  |
| AF429811.1 | Clethrionomys | glareolus |  |
| AY062907.1 | Clethrionomys | glareolus |  |
| AF429782.1 | Clethrionomys | glareolus |  |
| AF429798.1 | Clethrionomys | glareolus |  |
| AF429783.1 | Clethrionomys | glareolus |  |
| AF429784.1 | Clethrionomys | glareolus |  |
| AF429785.1 | Clethrionomys | glareolus |  |
| AF429786.1 | Clethrionomys | glareolus |  |
| AF429787.1 | Clethrionomys | glareolus |  |
| AF429788.1 | Clethrionomys | glareolus |  |
| AF367074.1 | Clethrionomys | glareolus |  |
| AF367081.1 | Clethrionomys | glareolus |  |
| AF429799.1 | Clethrionomys | glareolus |  |
| AF429800.1 | Clethrionomys | glareolus |  |
| AF367082.1 | Clethrionomys | glareolus |  |
| AF429795.1 | Clethrionomys | glareolus |  |

|            |               |           |  |
|------------|---------------|-----------|--|
| AF429796.1 | Clethrionomys | glareolus |  |
| AF429789.1 | Clethrionomys | glareolus |  |
| AF429801.1 | Clethrionomys | glareolus |  |
| AF429802.1 | Clethrionomys | glareolus |  |
| AF429803.1 | Clethrionomys | glareolus |  |
| AF367083.1 | Clethrionomys | glareolus |  |
| AF429804.1 | Clethrionomys | glareolus |  |
| AF429794.1 | Clethrionomys | glareolus |  |
| AF429797.1 | Clethrionomys | glareolus |  |
| AF429805.1 | Clethrionomys | glareolus |  |
| AF429806.1 | Clethrionomys | glareolus |  |
| AF429807.1 | Clethrionomys | glareolus |  |
| AF429808.1 | Clethrionomys | glareolus |  |
| AF429790.1 | Clethrionomys | glareolus |  |
| AF367084.1 | Clethrionomys | glareolus |  |
| AF429809.1 | Clethrionomys | glareolus |  |
| AY062900.1 | Clethrionomys | glareolus |  |
| AM392368.1 | Clethrionomys | glareolus |  |
| AJ639699.1 | Clethrionomys | glareolus |  |
| AJ639700.1 | Clethrionomys | glareolus |  |
| AJ639701.1 | Clethrionomys | glareolus |  |
| AJ639702.1 | Clethrionomys | glareolus |  |
| AJ639703.1 | Clethrionomys | glareolus |  |
| AJ639707.1 | Clethrionomys | glareolus |  |
| AJ639704.1 | Clethrionomys | glareolus |  |
| AJ639705.1 | Clethrionomys | glareolus |  |
| AJ639706.1 | Clethrionomys | glareolus |  |
| AJ639661.1 | Clethrionomys | glareolus |  |
| AJ639686.2 | Clethrionomys | glareolus |  |
| AJ639688.1 | Clethrionomys | glareolus |  |
| AJ639689.1 | Clethrionomys | glareolus |  |
| AJ639685.1 | Clethrionomys | glareolus |  |
| AJ639683.2 | Clethrionomys | glareolus |  |
| AJ639680.2 | Clethrionomys | glareolus |  |
| AJ639682.1 | Clethrionomys | glareolus |  |
| AJ639679.1 | Clethrionomys | glareolus |  |
| AJ639678.1 | Clethrionomys | glareolus |  |
| AJ639691.2 | Clethrionomys | glareolus |  |
| AJ639681.2 | Clethrionomys | glareolus |  |
| AJ639692.1 | Clethrionomys | glareolus |  |
| AJ639677.1 | Clethrionomys | glareolus |  |
| AJ639693.1 | Clethrionomys | glareolus |  |
| AJ639675.1 | Clethrionomys | glareolus |  |
| AJ639674.1 | Clethrionomys | glareolus |  |

|            |               |           |  |
|------------|---------------|-----------|--|
| AJ639673.2 | Clethrionomys | glareolus |  |
| AJ639672.1 | Clethrionomys | glareolus |  |
| AJ639695.1 | Clethrionomys | glareolus |  |
| AJ639684.1 | Clethrionomys | glareolus |  |
| AJ639696.1 | Clethrionomys | glareolus |  |
| AJ639667.1 | Clethrionomys | glareolus |  |
| AJ639665.1 | Clethrionomys | glareolus |  |
| AJ639664.1 | Clethrionomys | glareolus |  |
| AJ639663.1 | Clethrionomys | glareolus |  |
| AJ639662.1 | Clethrionomys | glareolus |  |
| AJ639708.1 | Clethrionomys | glareolus |  |
| AJ867965.1 | Clethrionomys | glareolus |  |
| AJ867966.1 | Clethrionomys | glareolus |  |
| AJ867967.1 | Clethrionomys | glareolus |  |
| AJ867969.1 | Clethrionomys | glareolus |  |
| AJ867970.1 | Clethrionomys | glareolus |  |
| AJ867971.1 | Clethrionomys | glareolus |  |
| AJ867972.1 | Clethrionomys | glareolus |  |
| AJ867979.1 | Clethrionomys | glareolus |  |
| AJ867948.1 | Clethrionomys | glareolus |  |
| AJ867959.1 | Clethrionomys | glareolus |  |
| AJ867980.1 | Clethrionomys | glareolus |  |
| AJ867973.1 | Clethrionomys | glareolus |  |
| AJ867974.1 | Clethrionomys | glareolus |  |
| AJ867976.1 | Clethrionomys | glareolus |  |
| AJ867977.1 | Clethrionomys | glareolus |  |
| AJ867975.1 | Clethrionomys | glareolus |  |
| AJ867950.1 | Clethrionomys | glareolus |  |
| AJ867956.1 | Clethrionomys | glareolus |  |
| AJ867960.1 | Clethrionomys | glareolus |  |
| AJ867951.1 | Clethrionomys | glareolus |  |
| AJ867961.1 | Clethrionomys | glareolus |  |
| AJ867981.1 | Clethrionomys | glareolus |  |
| AJ867962.1 | Clethrionomys | glareolus |  |
| AJ867957.1 | Clethrionomys | glareolus |  |
| AJ867952.1 | Clethrionomys | glareolus |  |
| AJ867958.1 | Clethrionomys | glareolus |  |
| AJ867963.1 | Clethrionomys | glareolus |  |
| AJ867949.1 | Clethrionomys | glareolus |  |
| AJ867953.1 | Clethrionomys | glareolus |  |
| AJ867954.1 | Clethrionomys | glareolus |  |
| AJ867955.1 | Clethrionomys | glareolus |  |
| AJ867978.1 | Clethrionomys | glareolus |  |
| DQ389591.1 | Clethrionomys | glareolus |  |

|            |               |           |  |
|------------|---------------|-----------|--|
| DQ389580.1 | Clethrionomys | glareolus |  |
| DQ389581.1 | Clethrionomys | glareolus |  |
| AF318584.1 | Clethrionomys | glareolus |  |
| AF318585.1 | Clethrionomys | glareolus |  |
| AY309420.1 | Clethrionomys | glareolus |  |
| AY309421.1 | Clethrionomys | glareolus |  |
| DQ408266.1 | Clethrionomys | glareolus |  |
| DQ408267.1 | Clethrionomys | glareolus |  |
| DQ408277.1 | Clethrionomys | glareolus |  |
| DQ408279.1 | Clethrionomys | glareolus |  |
| DQ408280.1 | Clethrionomys | glareolus |  |
| DQ408281.1 | Clethrionomys | glareolus |  |
| DQ408282.1 | Clethrionomys | glareolus |  |
| DQ408283.1 | Clethrionomys | glareolus |  |
| DQ408284.1 | Clethrionomys | glareolus |  |
| DQ408285.1 | Clethrionomys | glareolus |  |
| DQ408286.1 | Clethrionomys | glareolus |  |
| DQ408287.1 | Clethrionomys | glareolus |  |
| DQ408288.1 | Clethrionomys | glareolus |  |
| DQ408289.1 | Clethrionomys | glareolus |  |
| DQ408290.1 | Clethrionomys | glareolus |  |
| DQ408291.1 | Clethrionomys | glareolus |  |
| DQ408292.1 | Clethrionomys | glareolus |  |
| DQ408293.1 | Clethrionomys | glareolus |  |
| DQ408278.1 | Clethrionomys | glareolus |  |
| DQ408265.1 | Clethrionomys | glareolus |  |
| DQ408264.1 | Clethrionomys | glareolus |  |
| DQ393795.1 | Clethrionomys | glareolus |  |
| DQ393796.1 | Clethrionomys | glareolus |  |
| DQ393797.1 | Clethrionomys | glareolus |  |
| DQ393798.1 | Clethrionomys | glareolus |  |
| DQ393799.1 | Clethrionomys | glareolus |  |
| DQ393800.1 | Clethrionomys | glareolus |  |
| DQ393801.1 | Clethrionomys | glareolus |  |
| DQ393802.1 | Clethrionomys | glareolus |  |
| DQ393803.1 | Clethrionomys | glareolus |  |
| DQ393804.1 | Clethrionomys | glareolus |  |
| DQ393805.1 | Clethrionomys | glareolus |  |
| AY275109.1 | Cricetus      | cricetus  |  |
| EU107523.1 | Cricetus      | cricetus  |  |
| EU107532.1 | Cricetus      | cricetus  |  |
| EU107533.1 | Cricetus      | cricetus  |  |
| EU107534.1 | Cricetus      | cricetus  |  |
| EU107535.1 | Cricetus      | cricetus  |  |

|            |          |           |  |
|------------|----------|-----------|--|
| EU107524.1 | Cricetus | cricetus  |  |
| EU107525.1 | Cricetus | cricetus  |  |
| EU107526.1 | Cricetus | cricetus  |  |
| EU107527.1 | Cricetus | cricetus  |  |
| EU107528.1 | Cricetus | cricetus  |  |
| EU107529.1 | Cricetus | cricetus  |  |
| EU107530.1 | Cricetus | cricetus  |  |
| EU107531.1 | Cricetus | cricetus  |  |
| AJ973392.1 | Cricetus | cricetus  |  |
| AJ633756.1 | Cricetus | cricetus  |  |
| AJ633757.1 | Cricetus | cricetus  |  |
| AJ633758.1 | Cricetus | cricetus  |  |
| AJ633759.1 | Cricetus | cricetus  |  |
| AJ633760.1 | Cricetus | cricetus  |  |
| AJ633761.1 | Cricetus | cricetus  |  |
| AJ633762.1 | Cricetus | cricetus  |  |
| AJ633763.1 | Cricetus | cricetus  |  |
| AJ633764.1 | Cricetus | cricetus  |  |
| AJ633765.1 | Cricetus | cricetus  |  |
| AJ633766.1 | Cricetus | cricetus  |  |
| AJ633767.1 | Cricetus | cricetus  |  |
| AJ633768.1 | Cricetus | cricetus  |  |
| AJ633769.1 | Cricetus | cricetus  |  |
| AJ633770.1 | Cricetus | cricetus  |  |
| AJ633771.1 | Cricetus | cricetus  |  |
| AJ633772.1 | Cricetus | cricetus  |  |
| AJ633773.1 | Cricetus | cricetus  |  |
| AJ633774.1 | Cricetus | cricetus  |  |
| AJ633775.1 | Cricetus | cricetus  |  |
| AJ633776.1 | Cricetus | cricetus  |  |
| AJ633777.1 | Cricetus | cricetus  |  |
| AJ633779.1 | Cricetus | cricetus  |  |
| AJ633780.1 | Cricetus | cricetus  |  |
| AJ633782.1 | Cricetus | cricetus  |  |
| AJ490302.1 | Cricetus | cricetus  |  |
| AJ490303.1 | Cricetus | cricetus  |  |
| AJ490304.1 | Cricetus | cricetus  |  |
| AJ490305.1 | Cricetus | cricetus  |  |
| AJ490306.1 | Cricetus | cricetus  |  |
| AJ490307.1 | Cricetus | cricetus  |  |
| AJ490308.1 | Cricetus | cricetus  |  |
| AJ490309.1 | Cricetus | cricetus  |  |
| AJ490310.1 | Cricetus | cricetus  |  |
| AJ225030.1 | Eliomys  | quercinus |  |

|            |          |           |  |
|------------|----------|-----------|--|
| GQ453668.1 | Eliomys  | quercinus |  |
| GQ453669.1 | Eliomys  | quercinus |  |
| AJ225031.1 | Glis     | glis      |  |
| AF143929.1 | Marmota  | marmota   |  |
| AF143930.1 | Marmota  | marmota   |  |
| AF100711.1 | Marmota  | marmota   |  |
| AF159399.1 | Micromys | minutus   |  |
| AB033697.1 | Micromys | minutus   |  |
| AB201984.1 | Micromys | minutus   |  |
| AB201985.1 | Micromys | minutus   |  |
| AB201976.1 | Micromys | minutus   |  |
| AB201981.1 | Micromys | minutus   |  |
| AB201982.1 | Micromys | minutus   |  |
| AB201983.1 | Micromys | minutus   |  |
| AB201967.1 | Micromys | minutus   |  |
| AB201966.1 | Micromys | minutus   |  |
| AB201968.1 | Micromys | minutus   |  |
| AB201965.1 | Micromys | minutus   |  |
| AB201959.1 | Micromys | minutus   |  |
| AB201986.1 | Micromys | minutus   |  |
| AB201987.1 | Micromys | minutus   |  |
| AB201989.1 | Micromys | minutus   |  |
| AB201990.1 | Micromys | minutus   |  |
| AB201991.1 | Micromys | minutus   |  |
| AB201992.1 | Micromys | minutus   |  |
| AB201993.1 | Micromys | minutus   |  |
| AB201994.1 | Micromys | minutus   |  |
| AB201995.1 | Micromys | minutus   |  |
| AB201988.1 | Micromys | minutus   |  |
| AB201996.1 | Micromys | minutus   |  |
| AB201975.1 | Micromys | minutus   |  |
| AB201969.1 | Micromys | minutus   |  |
| AB201970.1 | Micromys | minutus   |  |
| AB201971.1 | Micromys | minutus   |  |
| AB201972.1 | Micromys | minutus   |  |
| AB201973.1 | Micromys | minutus   |  |
| AB201974.1 | Micromys | minutus   |  |
| AB201979.1 | Micromys | minutus   |  |
| AB201980.1 | Micromys | minutus   |  |
| AB201960.1 | Micromys | minutus   |  |
| AB201961.1 | Micromys | minutus   |  |
| AB201962.1 | Micromys | minutus   |  |
| AB201963.1 | Micromys | minutus   |  |
| AB201958.1 | Micromys | minutus   |  |

|            |          |          |  |
|------------|----------|----------|--|
| AB201964.1 | Micromys | minutus  |  |
| AB201977.1 | Micromys | minutus  |  |
| AB201978.1 | Micromys | minutus  |  |
| AB125080.1 | Micromys | minutus  |  |
| AB125091.1 | Micromys | minutus  |  |
| AB125092.1 | Micromys | minutus  |  |
| AB125078.1 | Micromys | minutus  |  |
| AB125079.1 | Micromys | minutus  |  |
| AB125093.1 | Micromys | minutus  |  |
| AB125095.1 | Micromys | minutus  |  |
| AB125096.1 | Micromys | minutus  |  |
| AB125097.1 | Micromys | minutus  |  |
| AB125088.1 | Micromys | minutus  |  |
| AB125089.1 | Micromys | minutus  |  |
| AB125090.1 | Micromys | minutus  |  |
| AB125082.1 | Micromys | minutus  |  |
| AB125083.1 | Micromys | minutus  |  |
| AB125085.1 | Micromys | minutus  |  |
| AB125086.1 | Micromys | minutus  |  |
| AB125087.1 | Micromys | minutus  |  |
| AB125069.1 | Micromys | minutus  |  |
| AB125084.1 | Micromys | minutus  |  |
| AB125098.1 | Micromys | minutus  |  |
| AB125099.1 | Micromys | minutus  |  |
| AB125100.1 | Micromys | minutus  |  |
| AB125081.1 | Micromys | minutus  |  |
| AB125070.1 | Micromys | minutus  |  |
| AB125071.1 | Micromys | minutus  |  |
| AB125072.1 | Micromys | minutus  |  |
| AB125073.1 | Micromys | minutus  |  |
| AB125074.1 | Micromys | minutus  |  |
| AB125075.1 | Micromys | minutus  |  |
| AB125076.1 | Micromys | minutus  |  |
| AB125077.1 | Micromys | minutus  |  |
| AB125094.1 | Micromys | minutus  |  |
| HM217360.1 | Micromys | minutus  |  |
| HM217361.1 | Micromys | minutus  |  |
| AF119271.1 | Microtus | agrestis |  |
| AF159402.1 | Microtus | agrestis |  |
| DQ663658.1 | Microtus | agrestis |  |
| AY167155.1 | Microtus | agrestis |  |
| AY167213.1 | Microtus | agrestis |  |
| AY167180.1 | Microtus | agrestis |  |
| AY167149.1 | Microtus | agrestis |  |

|            |          |          |  |
|------------|----------|----------|--|
| AY167156.1 | Microtus | agrestis |  |
| AY167157.1 | Microtus | agrestis |  |
| AY167171.1 | Microtus | agrestis |  |
| AY167175.1 | Microtus | agrestis |  |
| AY167151.1 | Microtus | agrestis |  |
| AY167152.1 | Microtus | agrestis |  |
| AY167212.1 | Microtus | agrestis |  |
| AY167179.1 | Microtus | agrestis |  |
| AY167184.1 | Microtus | agrestis |  |
| AY167194.1 | Microtus | agrestis |  |
| AY167170.1 | Microtus | agrestis |  |
| AY167193.1 | Microtus | agrestis |  |
| AY167197.1 | Microtus | agrestis |  |
| AY167192.1 | Microtus | agrestis |  |
| AY167191.1 | Microtus | agrestis |  |
| AY167150.1 | Microtus | agrestis |  |
| AY167198.1 | Microtus | agrestis |  |
| AY167199.1 | Microtus | agrestis |  |
| AY167205.1 | Microtus | agrestis |  |
| AY167195.1 | Microtus | agrestis |  |
| AY167196.1 | Microtus | agrestis |  |
| AY167169.1 | Microtus | agrestis |  |
| AY167173.1 | Microtus | agrestis |  |
| AY167188.1 | Microtus | agrestis |  |
| AY167189.1 | Microtus | agrestis |  |
| AY167210.1 | Microtus | agrestis |  |
| AY167176.1 | Microtus | agrestis |  |
| AY167177.1 | Microtus | agrestis |  |
| AY167178.1 | Microtus | agrestis |  |
| AY167183.1 | Microtus | agrestis |  |
| AY167202.1 | Microtus | agrestis |  |
| AY167185.1 | Microtus | agrestis |  |
| AY167186.1 | Microtus | agrestis |  |
| AY167172.1 | Microtus | agrestis |  |
| AY167190.1 | Microtus | agrestis |  |
| AY167182.1 | Microtus | agrestis |  |
| AY167181.1 | Microtus | agrestis |  |
| AY167162.1 | Microtus | agrestis |  |
| AY167163.1 | Microtus | agrestis |  |
| AY167187.1 | Microtus | agrestis |  |
| AY167164.1 | Microtus | agrestis |  |
| AY167211.1 | Microtus | agrestis |  |
| AY167201.1 | Microtus | agrestis |  |
| AY167200.1 | Microtus | agrestis |  |

|            |          |          |  |
|------------|----------|----------|--|
| AY167203.1 | Microtus | agrestis |  |
| AY167208.1 | Microtus | agrestis |  |
| AY167209.1 | Microtus | agrestis |  |
| AY167207.1 | Microtus | agrestis |  |
| AY167206.1 | Microtus | agrestis |  |
| AY167204.1 | Microtus | agrestis |  |
| AY167167.1 | Microtus | agrestis |  |
| AY167168.1 | Microtus | agrestis |  |
| AY167160.1 | Microtus | agrestis |  |
| AY167161.1 | Microtus | agrestis |  |
| AY167158.1 | Microtus | agrestis |  |
| AY167159.1 | Microtus | agrestis |  |
| AY167153.1 | Microtus | agrestis |  |
| AY167154.1 | Microtus | agrestis |  |
| AY167174.1 | Microtus | agrestis |  |
| AY167166.1 | Microtus | agrestis |  |
| AY167165.1 | Microtus | agrestis |  |
| FJ619775.1 | Microtus | agrestis |  |
| FJ619779.1 | Microtus | agrestis |  |
| FJ619764.1 | Microtus | agrestis |  |
| FJ619765.1 | Microtus | agrestis |  |
| FJ619776.1 | Microtus | agrestis |  |
| FJ619784.1 | Microtus | agrestis |  |
| FJ619777.1 | Microtus | agrestis |  |
| FJ619746.1 | Microtus | agrestis |  |
| FJ619785.1 | Microtus | agrestis |  |
| FJ619778.1 | Microtus | agrestis |  |
| FJ619786.1 | Microtus | agrestis |  |
| FJ619755.1 | Microtus | agrestis |  |
| FJ619756.1 | Microtus | agrestis |  |
| FJ619747.1 | Microtus | agrestis |  |
| FJ619748.1 | Microtus | agrestis |  |
| FJ619749.1 | Microtus | agrestis |  |
| FJ619757.1 | Microtus | agrestis |  |
| FJ619758.1 | Microtus | agrestis |  |
| FJ619766.1 | Microtus | agrestis |  |
| FJ619750.1 | Microtus | agrestis |  |
| FJ619767.1 | Microtus | agrestis |  |
| FJ619751.1 | Microtus | agrestis |  |
| FJ619759.1 | Microtus | agrestis |  |
| FJ619760.1 | Microtus | agrestis |  |
| FJ619768.1 | Microtus | agrestis |  |
| FJ619781.1 | Microtus | agrestis |  |
| FJ619769.1 | Microtus | agrestis |  |

|            |          |          |  |
|------------|----------|----------|--|
| FJ619752.1 | Microtus | agrestis |  |
| FJ619782.1 | Microtus | agrestis |  |
| FJ619761.1 | Microtus | agrestis |  |
| FJ619770.1 | Microtus | agrestis |  |
| FJ619762.1 | Microtus | agrestis |  |
| FJ619771.1 | Microtus | agrestis |  |
| FJ619753.1 | Microtus | agrestis |  |
| FJ619763.1 | Microtus | agrestis |  |
| FJ619783.1 | Microtus | agrestis |  |
| FJ619772.1 | Microtus | agrestis |  |
| FJ619754.1 | Microtus | agrestis |  |
| FJ619773.1 | Microtus | agrestis |  |
| FJ619774.1 | Microtus | agrestis |  |
| FJ619780.1 | Microtus | agrestis |  |
| EU439956.1 | Microtus | agrestis |  |
| DQ662101.1 | Microtus | agrestis |  |
| DQ662102.1 | Microtus | agrestis |  |
| DQ768145.1 | Microtus | agrestis |  |
| DQ662097.1 | Microtus | agrestis |  |
| DQ662098.1 | Microtus | agrestis |  |
| DQ662096.1 | Microtus | agrestis |  |
| DQ662099.1 | Microtus | agrestis |  |
| DQ662095.1 | Microtus | agrestis |  |
| DQ662100.1 | Microtus | agrestis |  |
| DQ768140.1 | Microtus | agrestis |  |
| DQ768141.1 | Microtus | agrestis |  |
| DQ480084.1 | Microtus | agrestis |  |
| AF159403.1 | Microtus | arvalis  |  |
| DQ663659.1 | Microtus | arvalis  |  |
| FJ789987.1 | Microtus | arvalis  |  |
| AY220761.1 | Microtus | arvalis  |  |
| AY708460.1 | Microtus | arvalis  |  |
| AY708461.1 | Microtus | arvalis  |  |
| GU187363.1 | Microtus | arvalis  |  |
| GU187372.1 | Microtus | arvalis  |  |
| GU187373.1 | Microtus | arvalis  |  |
| GU187374.1 | Microtus | arvalis  |  |
| GU187375.1 | Microtus | arvalis  |  |
| GU187376.1 | Microtus | arvalis  |  |
| GU187377.1 | Microtus | arvalis  |  |
| GU187378.1 | Microtus | arvalis  |  |
| GU187379.1 | Microtus | arvalis  |  |
| GU187380.1 | Microtus | arvalis  |  |
| GU187364.1 | Microtus | arvalis  |  |

|            |          |         |  |
|------------|----------|---------|--|
| GU187365.1 | Microtus | arvalis |  |
| GU187366.1 | Microtus | arvalis |  |
| GU187367.1 | Microtus | arvalis |  |
| GU187369.1 | Microtus | arvalis |  |
| GU187368.1 | Microtus | arvalis |  |
| GU187370.1 | Microtus | arvalis |  |
| GU187371.1 | Microtus | arvalis |  |
| AY708508.1 | Microtus | arvalis |  |
| AY708509.1 | Microtus | arvalis |  |
| AY708510.1 | Microtus | arvalis |  |
| AY708462.1 | Microtus | arvalis |  |
| FJ789989.1 | Microtus | arvalis |  |
| FJ789990.1 | Microtus | arvalis |  |
| FJ789991.1 | Microtus | arvalis |  |
| FJ789992.1 | Microtus | arvalis |  |
| AY708463.1 | Microtus | arvalis |  |
| AY708464.1 | Microtus | arvalis |  |
| FJ789993.1 | Microtus | arvalis |  |
| AY708512.1 | Microtus | arvalis |  |
| AY708513.1 | Microtus | arvalis |  |
| AY708465.1 | Microtus | arvalis |  |
| AY708466.1 | Microtus | arvalis |  |
| FJ789994.1 | Microtus | arvalis |  |
| FJ789995.1 | Microtus | arvalis |  |
| FJ789996.1 | Microtus | arvalis |  |
| AY708482.1 | Microtus | arvalis |  |
| FJ789997.1 | Microtus | arvalis |  |
| FJ789998.1 | Microtus | arvalis |  |
| FJ789999.1 | Microtus | arvalis |  |
| FJ790000.1 | Microtus | arvalis |  |
| FJ790001.1 | Microtus | arvalis |  |
| AY708519.1 | Microtus | arvalis |  |
| FJ790002.1 | Microtus | arvalis |  |
| AY708514.1 | Microtus | arvalis |  |
| AY708515.1 | Microtus | arvalis |  |
| AY708516.1 | Microtus | arvalis |  |
| AY708467.1 | Microtus | arvalis |  |
| AY708468.1 | Microtus | arvalis |  |
| AY708469.1 | Microtus | arvalis |  |
| FJ790003.1 | Microtus | arvalis |  |
| FJ790004.1 | Microtus | arvalis |  |
| AY708487.1 | Microtus | arvalis |  |
| AY708486.1 | Microtus | arvalis |  |
| FJ790005.1 | Microtus | arvalis |  |

|            |          |         |  |
|------------|----------|---------|--|
| FJ790006.1 | Microtus | arvalis |  |
| FJ790007.1 | Microtus | arvalis |  |
| FJ790008.1 | Microtus | arvalis |  |
| FJ790009.1 | Microtus | arvalis |  |
| FJ790010.1 | Microtus | arvalis |  |
| AY708481.1 | Microtus | arvalis |  |
| FJ790011.1 | Microtus | arvalis |  |
| AY708517.1 | Microtus | arvalis |  |
| AY708518.1 | Microtus | arvalis |  |
| AY708470.1 | Microtus | arvalis |  |
| AY708471.1 | Microtus | arvalis |  |
| AY708472.1 | Microtus | arvalis |  |
| AY708473.1 | Microtus | arvalis |  |
| AY708505.1 | Microtus | arvalis |  |
| FJ790013.1 | Microtus | arvalis |  |
| AY708489.1 | Microtus | arvalis |  |
| AY708490.1 | Microtus | arvalis |  |
| AY708491.1 | Microtus | arvalis |  |
| AY708498.1 | Microtus | arvalis |  |
| AY220776.1 | Microtus | arvalis |  |
| AY708492.1 | Microtus | arvalis |  |
| AY708493.1 | Microtus | arvalis |  |
| AY708507.1 | Microtus | arvalis |  |
| FJ790014.1 | Microtus | arvalis |  |
| FJ790015.1 | Microtus | arvalis |  |
| FJ790016.1 | Microtus | arvalis |  |
| FJ790017.1 | Microtus | arvalis |  |
| FJ790018.1 | Microtus | arvalis |  |
| AY708474.1 | Microtus | arvalis |  |
| AY708475.1 | Microtus | arvalis |  |
| AY708476.1 | Microtus | arvalis |  |
| AY708477.1 | Microtus | arvalis |  |
| AY708478.1 | Microtus | arvalis |  |
| AY708479.1 | Microtus | arvalis |  |
| AY708480.1 | Microtus | arvalis |  |
| AY708494.1 | Microtus | arvalis |  |
| AY708520.1 | Microtus | arvalis |  |
| AY708495.1 | Microtus | arvalis |  |
| AY708496.1 | Microtus | arvalis |  |
| FJ790019.1 | Microtus | arvalis |  |
| FJ790020.1 | Microtus | arvalis |  |
| GU187381.1 | Microtus | arvalis |  |
| GU187382.1 | Microtus | arvalis |  |
| GU187383.1 | Microtus | arvalis |  |

|            |          |         |  |
|------------|----------|---------|--|
| GU187384.1 | Microtus | arvalis |  |
| GU187385.1 | Microtus | arvalis |  |
| GU187386.1 | Microtus | arvalis |  |
| GU187362.1 | Microtus | arvalis |  |
| AY708499.1 | Microtus | arvalis |  |
| AY708500.1 | Microtus | arvalis |  |
| AY708523.1 | Microtus | arvalis |  |
| AY708524.1 | Microtus | arvalis |  |
| AY708502.1 | Microtus | arvalis |  |
| AY708501.1 | Microtus | arvalis |  |
| AY708525.1 | Microtus | arvalis |  |
| AY708497.1 | Microtus | arvalis |  |
| AY708503.1 | Microtus | arvalis |  |
| AY708484.1 | Microtus | arvalis |  |
| AY708485.1 | Microtus | arvalis |  |
| AY220770.1 | Microtus | arvalis |  |
| AY708483.1 | Microtus | arvalis |  |
| AY708511.1 | Microtus | arvalis |  |
| AY708488.1 | Microtus | arvalis |  |
| AY220787.1 | Microtus | arvalis |  |
| AY708521.1 | Microtus | arvalis |  |
| AY708504.1 | Microtus | arvalis |  |
| FJ790023.1 | Microtus | arvalis |  |
| AY708522.1 | Microtus | arvalis |  |
| AY708506.1 | Microtus | arvalis |  |
| AY220760.1 | Microtus | arvalis |  |
| AY220777.1 | Microtus | arvalis |  |
| EU439454.1 | Microtus | arvalis |  |
| EU439455.1 | Microtus | arvalis |  |
| EU439456.1 | Microtus | arvalis |  |
| EU439457.1 | Microtus | arvalis |  |
| EU439458.1 | Microtus | arvalis |  |
| EU439459.1 | Microtus | arvalis |  |
| AY220769.1 | Microtus | arvalis |  |
| FJ790026.1 | Microtus | arvalis |  |
| AY220766.1 | Microtus | arvalis |  |
| FJ790027.1 | Microtus | arvalis |  |
| FJ790028.1 | Microtus | arvalis |  |
| FJ790029.1 | Microtus | arvalis |  |
| FJ790030.1 | Microtus | arvalis |  |
| AY220778.1 | Microtus | arvalis |  |
| AY220779.1 | Microtus | arvalis |  |
| AY220780.1 | Microtus | arvalis |  |
| AY220781.1 | Microtus | arvalis |  |

|            |          |         |  |
|------------|----------|---------|--|
| AY220782.1 | Microtus | arvalis |  |
| AY220783.1 | Microtus | arvalis |  |
| AY220785.1 | Microtus | arvalis |  |
| AY220786.1 | Microtus | arvalis |  |
| AY220773.1 | Microtus | arvalis |  |
| AY220772.1 | Microtus | arvalis |  |
| AY220774.1 | Microtus | arvalis |  |
| AY220775.1 | Microtus | arvalis |  |
| FJ790031.1 | Microtus | arvalis |  |
| FJ790032.1 | Microtus | arvalis |  |
| FJ790033.1 | Microtus | arvalis |  |
| AY220771.1 | Microtus | arvalis |  |
| AY220763.1 | Microtus | arvalis |  |
| AY220764.1 | Microtus | arvalis |  |
| AY220765.1 | Microtus | arvalis |  |
| AY220767.1 | Microtus | arvalis |  |
| AY220768.1 | Microtus | arvalis |  |
| AY220788.1 | Microtus | arvalis |  |
| AY220789.1 | Microtus | arvalis |  |
| AY220762.1 | Microtus | arvalis |  |
| GU954315.1 | Microtus | arvalis |  |
| GU954314.1 | Microtus | arvalis |  |
| EU439953.1 | Microtus | arvalis |  |
| EU439954.1 | Microtus | arvalis |  |
| EU439955.1 | Microtus | arvalis |  |
| EU439957.1 | Microtus | arvalis |  |
| EU439958.1 | Microtus | arvalis |  |
| EU439959.1 | Microtus | arvalis |  |
| AM991024.1 | Microtus | arvalis |  |
| AM991031.1 | Microtus | arvalis |  |
| AM991070.1 | Microtus | arvalis |  |
| AM991071.1 | Microtus | arvalis |  |
| AM991072.1 | Microtus | arvalis |  |
| AM991073.1 | Microtus | arvalis |  |
| AM991074.1 | Microtus | arvalis |  |
| AM991075.1 | Microtus | arvalis |  |
| AM991077.1 | Microtus | arvalis |  |
| AM991078.1 | Microtus | arvalis |  |
| AM991079.1 | Microtus | arvalis |  |
| AM991080.1 | Microtus | arvalis |  |
| AM991032.1 | Microtus | arvalis |  |
| AM991081.1 | Microtus | arvalis |  |
| AM991082.1 | Microtus | arvalis |  |
| AM991083.1 | Microtus | arvalis |  |

|            |          |         |  |
|------------|----------|---------|--|
| AM991084.1 | Microtus | arvalis |  |
| AM991085.1 | Microtus | arvalis |  |
| AM991086.1 | Microtus | arvalis |  |
| AM991087.1 | Microtus | arvalis |  |
| AM991088.1 | Microtus | arvalis |  |
| AM991089.1 | Microtus | arvalis |  |
| AM991090.1 | Microtus | arvalis |  |
| AM991033.1 | Microtus | arvalis |  |
| AM991091.1 | Microtus | arvalis |  |
| AM991093.1 | Microtus | arvalis |  |
| AM991094.1 | Microtus | arvalis |  |
| AM991034.1 | Microtus | arvalis |  |
| AM991035.1 | Microtus | arvalis |  |
| AM991036.1 | Microtus | arvalis |  |
| AM991095.1 | Microtus | arvalis |  |
| AM991096.1 | Microtus | arvalis |  |
| AM991025.1 | Microtus | arvalis |  |
| AM991037.1 | Microtus | arvalis |  |
| AM991038.1 | Microtus | arvalis |  |
| AM991039.1 | Microtus | arvalis |  |
| AM991040.1 | Microtus | arvalis |  |
| AM991041.1 | Microtus | arvalis |  |
| AM991042.1 | Microtus | arvalis |  |
| AM991043.1 | Microtus | arvalis |  |
| AM991044.1 | Microtus | arvalis |  |
| AM991045.1 | Microtus | arvalis |  |
| AM991046.1 | Microtus | arvalis |  |
| AM991047.1 | Microtus | arvalis |  |
| AM991026.1 | Microtus | arvalis |  |
| AM991048.1 | Microtus | arvalis |  |
| AM991049.1 | Microtus | arvalis |  |
| AM991050.1 | Microtus | arvalis |  |
| AM991051.1 | Microtus | arvalis |  |
| AM991052.1 | Microtus | arvalis |  |
| AM991053.1 | Microtus | arvalis |  |
| AM991097.1 | Microtus | arvalis |  |
| AM991098.1 | Microtus | arvalis |  |
| AM991054.1 | Microtus | arvalis |  |
| AM991027.1 | Microtus | arvalis |  |
| AM991055.1 | Microtus | arvalis |  |
| AM991056.1 | Microtus | arvalis |  |
| AM991057.1 | Microtus | arvalis |  |
| AM991058.1 | Microtus | arvalis |  |
| AM991028.1 | Microtus | arvalis |  |

|            |          |                  |  |
|------------|----------|------------------|--|
| AM991059.1 | Microtus | arvalis          |  |
| AM991060.1 | Microtus | arvalis          |  |
| AM991029.1 | Microtus | arvalis          |  |
| AM991061.1 | Microtus | arvalis          |  |
| AM991062.1 | Microtus | arvalis          |  |
| AM991063.1 | Microtus | arvalis          |  |
| AM991064.1 | Microtus | arvalis          |  |
| AM991065.1 | Microtus | arvalis          |  |
| AM991030.1 | Microtus | arvalis          |  |
| AM991066.1 | Microtus | arvalis          |  |
| AM991067.1 | Microtus | arvalis          |  |
| AM991068.1 | Microtus | arvalis          |  |
| AM991069.1 | Microtus | arvalis          |  |
| DQ768134.1 | Microtus | arvalis          |  |
| DQ768138.1 | Microtus | arvalis          |  |
| DQ768133.1 | Microtus | arvalis          |  |
| DQ768142.1 | Microtus | arvalis          |  |
| DQ768131.1 | Microtus | arvalis          |  |
| DQ768136.1 | Microtus | arvalis          |  |
| DQ663660.1 | Microtus | cabrerae         |  |
| AY513788.1 | Microtus | cabrerae         |  |
| AY513789.1 | Microtus | cabrerae         |  |
| GU954322.1 | Microtus | cabrerae         |  |
| AY513796.1 | Microtus | duodecimcostatus |  |
| AY513797.1 | Microtus | duodecimcostatus |  |
| AJ717744.1 | Microtus | duodecimcostatus |  |
| AM392375.1 | Microtus | duodecimcostatus |  |
| AY513799.1 | Microtus | gerbei           |  |
| AY513800.1 | Microtus | gerbei           |  |
| AY513801.1 | Microtus | gerbei           |  |
| AY513802.1 | Microtus | gerbei           |  |
| AY513812.1 | Microtus | lusitanicus      |  |
| AY513813.1 | Microtus | lusitanicus      |  |
| AJ717746.1 | Microtus | lusitanicus      |  |
| DQ663663.2 | Microtus | multiplex        |  |
| AY513815.1 | Microtus | multiplex        |  |
| AY513816.1 | Microtus | multiplex        |  |
| AY513817.1 | Microtus | multiplex        |  |
| AY513818.1 | Microtus | multiplex        |  |
| AJ717747.1 | Microtus | multiplex        |  |
| AY513824.1 | Microtus | savii            |  |
| AY513825.1 | Microtus | savii            |  |
| AY513826.1 | Microtus | savii            |  |
| AY513827.1 | Microtus | savii            |  |

|            |          |              |  |
|------------|----------|--------------|--|
| AY513828.1 | Microtus | savii        |  |
| EU158792.1 | Microtus | savii        |  |
| EU158800.1 | Microtus | savii        |  |
| EU158780.1 | Microtus | savii        |  |
| EU158781.1 | Microtus | savii        |  |
| EU158782.1 | Microtus | savii        |  |
| EU158790.1 | Microtus | savii        |  |
| EU158791.1 | Microtus | savii        |  |
| EU158788.1 | Microtus | savii        |  |
| EU158776.1 | Microtus | savii        |  |
| EU158785.1 | Microtus | savii        |  |
| EU158786.1 | Microtus | savii        |  |
| EU158789.1 | Microtus | savii        |  |
| EU158778.1 | Microtus | savii        |  |
| EU158796.1 | Microtus | savii        |  |
| EU158787.1 | Microtus | savii        |  |
| EU158783.1 | Microtus | savii        |  |
| EU158784.1 | Microtus | savii        |  |
| EU158804.1 | Microtus | savii        |  |
| EU158803.1 | Microtus | savii        |  |
| EU158802.1 | Microtus | savii        |  |
| EU158794.1 | Microtus | savii        |  |
| EU158795.1 | Microtus | savii        |  |
| EU158777.1 | Microtus | savii        |  |
| EU158793.1 | Microtus | savii        |  |
| EU158797.1 | Microtus | savii        |  |
| EU158798.1 | Microtus | savii        |  |
| EU158801.1 | Microtus | savii        |  |
| EU158799.1 | Microtus | savii        |  |
| DQ663665.1 | Microtus | subterraneus |  |
| AY513832.1 | Microtus | subterraneus |  |
| AY513833.1 | Microtus | subterraneus |  |
| AY513834.1 | Microtus | subterraneus |  |
| AY513835.1 | Microtus | subterraneus |  |
| AY513836.1 | Microtus | subterraneus |  |
| AJ717745.1 | Microtus | subterraneus |  |
| AK131583.1 | Mus      | musculus     |  |
| AK131591.1 | Mus      | musculus     |  |
| AK131866.1 | Mus      | musculus     |  |
| EU349766.1 | Mus      | musculus     |  |
| HQ270439.1 | Mus      | musculus     |  |
| HQ270440.1 | Mus      | musculus     |  |
| HQ270441.1 | Mus      | musculus     |  |
| HQ270442.1 | Mus      | musculus     |  |

|            |           |           |            |
|------------|-----------|-----------|------------|
| HQ270443.1 | Mus       | musculus  |            |
| HQ270444.1 | Mus       | musculus  |            |
| HQ270445.1 | Mus       | musculus  |            |
| HQ270446.1 | Mus       | musculus  |            |
| HQ270447.1 | Mus       | musculus  |            |
| HQ270448.1 | Mus       | musculus  |            |
| HQ270434.1 | Mus       | musculus  |            |
| HQ270449.1 | Mus       | musculus  |            |
| HQ270450.1 | Mus       | musculus  |            |
| HQ270451.1 | Mus       | musculus  |            |
| HQ270452.1 | Mus       | musculus  |            |
| HQ270453.1 | Mus       | musculus  |            |
| HQ270454.1 | Mus       | musculus  |            |
| HQ270455.1 | Mus       | musculus  |            |
| HQ270435.1 | Mus       | musculus  |            |
| HQ270436.1 | Mus       | musculus  |            |
| HQ270437.1 | Mus       | musculus  |            |
| HQ270438.1 | Mus       | musculus  |            |
| AY057807.1 | Mus       | musculus  |            |
| AF520636.1 | Mus       | musculus  | domesticus |
| AB125774.1 | Mus       | musculus  |            |
| AF520620.1 | Mus       | musculus  |            |
| AF520621.1 | Mus       | musculus  |            |
| AF520622.1 | Mus       | musculus  |            |
| AF520623.1 | Mus       | musculus  |            |
| AF520624.1 | Mus       | musculus  |            |
| AF520625.1 | Mus       | musculus  |            |
| HM222709.1 | Mus       | musculus  |            |
| AF520626.1 | Mus       | musculus  |            |
| AB033699.1 | Mus       | musculus  |            |
| AY057804.1 | Mus       | musculus  |            |
| AF520627.1 | Mus       | musculus  | musculus   |
| AF520628.1 | Mus       | musculus  | musculus   |
| AF520629.1 | Mus       | musculus  | musculus   |
| AB205273.1 | Mus       | musculus  |            |
| AB205274.1 | Mus       | musculus  |            |
| AB205275.1 | Mus       | musculus  |            |
| AY057810.1 | Mus       | spretus   |            |
| AY224678.1 | Mus       | spretus   |            |
| AF159398.1 | Mus       | spretus   |            |
| AB033700.1 | Mus       | spretus   |            |
| EU544663.1 | Myocastor | coypus    |            |
| FJ528598.1 | Myodes    | glareolus |            |
| EF408074.1 | Myodes    | glareolus |            |

|            |        |           |  |
|------------|--------|-----------|--|
| EF408072.1 | Myodes | glareolus |  |
| FJ881489.1 | Myodes | glareolus |  |
| FJ881490.1 | Myodes | glareolus |  |
| FJ881491.1 | Myodes | glareolus |  |
| FJ881492.1 | Myodes | glareolus |  |
| FJ881405.1 | Myodes | glareolus |  |
| FJ881406.1 | Myodes | glareolus |  |
| FJ881407.1 | Myodes | glareolus |  |
| EF408073.1 | Myodes | glareolus |  |
| EU439963.1 | Myodes | glareolus |  |
| EU439964.1 | Myodes | glareolus |  |
| EU439965.1 | Myodes | glareolus |  |
| EU439966.1 | Myodes | glareolus |  |
| EU439967.1 | Myodes | glareolus |  |
| FJ881448.1 | Myodes | glareolus |  |
| FJ881449.1 | Myodes | glareolus |  |
| DQ090752.1 | Myodes | glareolus |  |
| DQ090761.1 | Myodes | glareolus |  |
| FJ881450.1 | Myodes | glareolus |  |
| FJ881451.1 | Myodes | glareolus |  |
| FJ881437.1 | Myodes | glareolus |  |
| FJ881438.1 | Myodes | glareolus |  |
| DQ090757.1 | Myodes | glareolus |  |
| DQ090758.1 | Myodes | glareolus |  |
| FJ881439.1 | Myodes | glareolus |  |
| FJ881453.1 | Myodes | glareolus |  |
| FJ881452.1 | Myodes | glareolus |  |
| FJ881454.1 | Myodes | glareolus |  |
| FJ881456.1 | Myodes | glareolus |  |
| FJ881455.1 | Myodes | glareolus |  |
| FJ881408.1 | Myodes | glareolus |  |
| FJ881409.1 | Myodes | glareolus |  |
| FJ881410.1 | Myodes | glareolus |  |
| FJ881411.1 | Myodes | glareolus |  |
| FJ881440.1 | Myodes | glareolus |  |
| FJ881441.1 | Myodes | glareolus |  |
| FJ881442.1 | Myodes | glareolus |  |
| FJ881443.1 | Myodes | glareolus |  |
| FJ881389.1 | Myodes | glareolus |  |
| FJ881390.1 | Myodes | glareolus |  |
| FJ881391.1 | Myodes | glareolus |  |
| FJ881392.1 | Myodes | glareolus |  |
| FJ881393.1 | Myodes | glareolus |  |
| FJ881412.1 | Myodes | glareolus |  |

|            |        |           |  |
|------------|--------|-----------|--|
| FJ881413.1 | Myodes | glareolus |  |
| FJ881414.1 | Myodes | glareolus |  |
| FJ881394.1 | Myodes | glareolus |  |
| FJ881395.1 | Myodes | glareolus |  |
| FJ881396.1 | Myodes | glareolus |  |
| FJ881397.1 | Myodes | glareolus |  |
| FJ881457.1 | Myodes | glareolus |  |
| FJ881458.1 | Myodes | glareolus |  |
| FJ881459.1 | Myodes | glareolus |  |
| FJ881460.1 | Myodes | glareolus |  |
| FJ881461.1 | Myodes | glareolus |  |
| FJ881415.1 | Myodes | glareolus |  |
| FJ881416.1 | Myodes | glareolus |  |
| FJ881417.1 | Myodes | glareolus |  |
| FJ881418.1 | Myodes | glareolus |  |
| FJ881419.1 | Myodes | glareolus |  |
| FJ881462.1 | Myodes | glareolus |  |
| FJ881463.1 | Myodes | glareolus |  |
| FJ881464.1 | Myodes | glareolus |  |
| DQ090751.1 | Myodes | glareolus |  |
| FJ881465.1 | Myodes | glareolus |  |
| FJ881466.1 | Myodes | glareolus |  |
| DQ090760.1 | Myodes | glareolus |  |
| FJ881467.1 | Myodes | glareolus |  |
| FJ881475.1 | Myodes | glareolus |  |
| FJ881476.1 | Myodes | glareolus |  |
| FJ881477.1 | Myodes | glareolus |  |
| FJ881478.1 | Myodes | glareolus |  |
| FJ881468.1 | Myodes | glareolus |  |
| FJ881469.1 | Myodes | glareolus |  |
| DQ090755.1 | Myodes | glareolus |  |
| FJ881470.1 | Myodes | glareolus |  |
| FJ881444.1 | Myodes | glareolus |  |
| FJ881445.1 | Myodes | glareolus |  |
| FJ881446.1 | Myodes | glareolus |  |
| FJ881447.1 | Myodes | glareolus |  |
| FJ881479.1 | Myodes | glareolus |  |
| FJ881480.1 | Myodes | glareolus |  |
| DQ090753.1 | Myodes | glareolus |  |
| EF378948.1 | Myodes | glareolus |  |
| FJ881402.1 | Myodes | glareolus |  |
| FJ881403.1 | Myodes | glareolus |  |
| FJ881398.1 | Myodes | glareolus |  |
| FJ881399.1 | Myodes | glareolus |  |

|            |        |           |  |
|------------|--------|-----------|--|
| FJ881400.1 | Myodes | glareolus |  |
| FJ881401.1 | Myodes | glareolus |  |
| DQ090759.1 | Myodes | glareolus |  |
| FJ881404.1 | Myodes | glareolus |  |
| FJ881420.1 | Myodes | glareolus |  |
| FJ881421.1 | Myodes | glareolus |  |
| FJ881424.1 | Myodes | glareolus |  |
| FJ881422.1 | Myodes | glareolus |  |
| FJ881423.1 | Myodes | glareolus |  |
| FJ881425.1 | Myodes | glareolus |  |
| FJ881426.1 | Myodes | glareolus |  |
| FJ881427.1 | Myodes | glareolus |  |
| FJ881428.1 | Myodes | glareolus |  |
| FJ881429.1 | Myodes | glareolus |  |
| FJ881430.1 | Myodes | glareolus |  |
| FJ881471.1 | Myodes | glareolus |  |
| FJ881472.1 | Myodes | glareolus |  |
| FJ881473.1 | Myodes | glareolus |  |
| FJ881474.1 | Myodes | glareolus |  |
| EF408060.1 | Myodes | glareolus |  |
| FJ881481.1 | Myodes | glareolus |  |
| FJ881482.1 | Myodes | glareolus |  |
| FJ881483.1 | Myodes | glareolus |  |
| FJ881484.1 | Myodes | glareolus |  |
| FJ881485.1 | Myodes | glareolus |  |
| FJ881486.1 | Myodes | glareolus |  |
| FJ881487.1 | Myodes | glareolus |  |
| FJ881488.1 | Myodes | glareolus |  |
| FJ881431.1 | Myodes | glareolus |  |
| FJ881432.1 | Myodes | glareolus |  |
| FJ881433.1 | Myodes | glareolus |  |
| FJ881434.1 | Myodes | glareolus |  |
| FJ881435.1 | Myodes | glareolus |  |
| FJ881436.1 | Myodes | glareolus |  |
| DQ090756.1 | Myodes | glareolus |  |
| EU232136.1 | Myodes | glareolus |  |
| EU232146.1 | Myodes | glareolus |  |
| EU232147.1 | Myodes | glareolus |  |
| EU232148.1 | Myodes | glareolus |  |
| EU232150.1 | Myodes | glareolus |  |
| EU232151.1 | Myodes | glareolus |  |
| EU232152.1 | Myodes | glareolus |  |
| EU232153.1 | Myodes | glareolus |  |
| EU232154.1 | Myodes | glareolus |  |

|            |        |           |  |
|------------|--------|-----------|--|
| EU232155.1 | Myodes | glareolus |  |
| EU232137.1 | Myodes | glareolus |  |
| EU232156.1 | Myodes | glareolus |  |
| EU232157.1 | Myodes | glareolus |  |
| EU232158.1 | Myodes | glareolus |  |
| EU232159.1 | Myodes | glareolus |  |
| EU232160.1 | Myodes | glareolus |  |
| EU232161.1 | Myodes | glareolus |  |
| EU232162.1 | Myodes | glareolus |  |
| EU232164.1 | Myodes | glareolus |  |
| EU232165.1 | Myodes | glareolus |  |
| EU232166.1 | Myodes | glareolus |  |
| EU232167.1 | Myodes | glareolus |  |
| EU232168.1 | Myodes | glareolus |  |
| EU232169.1 | Myodes | glareolus |  |
| EU232170.1 | Myodes | glareolus |  |
| EU232171.1 | Myodes | glareolus |  |
| EU232139.1 | Myodes | glareolus |  |
| EU232140.1 | Myodes | glareolus |  |
| EU232141.1 | Myodes | glareolus |  |
| EU232142.1 | Myodes | glareolus |  |
| EU232144.1 | Myodes | glareolus |  |
| EF408066.1 | Myodes | glareolus |  |
| EU077269.1 | Myodes | glareolus |  |
| EU035707.1 | Myodes | glareolus |  |
| EU035639.1 | Myodes | glareolus |  |
| EU035648.1 | Myodes | glareolus |  |
| EU035649.1 | Myodes | glareolus |  |
| EU035650.1 | Myodes | glareolus |  |
| EU035651.1 | Myodes | glareolus |  |
| EU035652.1 | Myodes | glareolus |  |
| EU035653.1 | Myodes | glareolus |  |
| EU035654.1 | Myodes | glareolus |  |
| EU035656.1 | Myodes | glareolus |  |
| EU035708.1 | Myodes | glareolus |  |
| EU035640.1 | Myodes | glareolus |  |
| EU035657.1 | Myodes | glareolus |  |
| EU035658.1 | Myodes | glareolus |  |
| EU035659.1 | Myodes | glareolus |  |
| EU035665.1 | Myodes | glareolus |  |
| EU035666.1 | Myodes | glareolus |  |
| EU035709.1 | Myodes | glareolus |  |
| EU035641.1 | Myodes | glareolus |  |
| EU035667.1 | Myodes | glareolus |  |

|            |        |           |  |
|------------|--------|-----------|--|
| EU035668.1 | Myodes | glareolus |  |
| EU035669.1 | Myodes | glareolus |  |
| EU035670.1 | Myodes | glareolus |  |
| EU035671.1 | Myodes | glareolus |  |
| EU035672.1 | Myodes | glareolus |  |
| EU035673.1 | Myodes | glareolus |  |
| EU035674.1 | Myodes | glareolus |  |
| EU035675.1 | Myodes | glareolus |  |
| EU035642.1 | Myodes | glareolus |  |
| EU035710.1 | Myodes | glareolus |  |
| EU035680.1 | Myodes | glareolus |  |
| EU035681.1 | Myodes | glareolus |  |
| EU035682.1 | Myodes | glareolus |  |
| EU035683.1 | Myodes | glareolus |  |
| EU035684.1 | Myodes | glareolus |  |
| EU035685.1 | Myodes | glareolus |  |
| EU035686.1 | Myodes | glareolus |  |
| EU035643.1 | Myodes | glareolus |  |
| EU035687.1 | Myodes | glareolus |  |
| EU035688.1 | Myodes | glareolus |  |
| EU035689.1 | Myodes | glareolus |  |
| EU035690.1 | Myodes | glareolus |  |
| EU035691.1 | Myodes | glareolus |  |
| EU035692.1 | Myodes | glareolus |  |
| EU035693.1 | Myodes | glareolus |  |
| EU035644.1 | Myodes | glareolus |  |
| EU035697.1 | Myodes | glareolus |  |
| EU035699.1 | Myodes | glareolus |  |
| EU035700.1 | Myodes | glareolus |  |
| EU035701.1 | Myodes | glareolus |  |
| EU035702.1 | Myodes | glareolus |  |
| EU035703.1 | Myodes | glareolus |  |
| EU035704.1 | Myodes | glareolus |  |
| EU035705.1 | Myodes | glareolus |  |
| EU035706.1 | Myodes | glareolus |  |
| EU035645.1 | Myodes | glareolus |  |
| EU035646.1 | Myodes | glareolus |  |
| GQ339501.1 | Myodes | glareolus |  |
| EU523549.1 | Myodes | glareolus |  |
| EU523550.1 | Myodes | glareolus |  |
| EU523551.1 | Myodes | glareolus |  |
| EU523552.1 | Myodes | glareolus |  |
| EU523553.1 | Myodes | glareolus |  |
| GQ339500.1 | Myodes | glareolus |  |

|            |        |           |  |
|------------|--------|-----------|--|
| GQ339497.1 | Myodes | glareolus |  |
| GQ339499.1 | Myodes | glareolus |  |
| GQ339496.1 | Myodes | glareolus |  |
| GQ339502.1 | Myodes | glareolus |  |
| GQ339498.1 | Myodes | glareolus |  |
| GQ339503.1 | Myodes | glareolus |  |
| EF408068.1 | Myodes | glareolus |  |
| EF408061.1 | Myodes | glareolus |  |
| FJ640950.1 | Myodes | glareolus |  |
| FJ640951.1 | Myodes | glareolus |  |
| FJ640865.1 | Myodes | glareolus |  |
| FJ640866.1 | Myodes | glareolus |  |
| FJ640867.1 | Myodes | glareolus |  |
| FJ640868.1 | Myodes | glareolus |  |
| FJ640869.1 | Myodes | glareolus |  |
| FJ640870.1 | Myodes | glareolus |  |
| FJ640871.1 | Myodes | glareolus |  |
| FJ640872.1 | Myodes | glareolus |  |
| FJ640873.1 | Myodes | glareolus |  |
| FJ640874.1 | Myodes | glareolus |  |
| FJ640875.1 | Myodes | glareolus |  |
| FJ640876.1 | Myodes | glareolus |  |
| FJ640877.1 | Myodes | glareolus |  |
| FJ640878.1 | Myodes | glareolus |  |
| FJ640879.1 | Myodes | glareolus |  |
| FJ640880.1 | Myodes | glareolus |  |
| FJ640881.1 | Myodes | glareolus |  |
| FJ640882.1 | Myodes | glareolus |  |
| FJ640883.1 | Myodes | glareolus |  |
| FJ640884.1 | Myodes | glareolus |  |
| FJ640885.1 | Myodes | glareolus |  |
| FJ640886.1 | Myodes | glareolus |  |
| FJ640887.1 | Myodes | glareolus |  |
| FJ640888.1 | Myodes | glareolus |  |
| FJ640889.1 | Myodes | glareolus |  |
| FJ640890.1 | Myodes | glareolus |  |
| FJ640891.1 | Myodes | glareolus |  |
| FJ640892.1 | Myodes | glareolus |  |
| FJ640893.1 | Myodes | glareolus |  |
| FJ640894.1 | Myodes | glareolus |  |
| FJ640895.1 | Myodes | glareolus |  |
| FJ640896.1 | Myodes | glareolus |  |
| FJ640897.1 | Myodes | glareolus |  |
| FJ640898.1 | Myodes | glareolus |  |

|            |        |           |  |
|------------|--------|-----------|--|
| FJ640899.1 | Myodes | glareolus |  |
| FJ640900.1 | Myodes | glareolus |  |
| FJ640901.1 | Myodes | glareolus |  |
| FJ640902.1 | Myodes | glareolus |  |
| FJ640903.1 | Myodes | glareolus |  |
| FJ640904.1 | Myodes | glareolus |  |
| FJ640905.1 | Myodes | glareolus |  |
| FJ640906.1 | Myodes | glareolus |  |
| FJ640907.1 | Myodes | glareolus |  |
| FJ640908.1 | Myodes | glareolus |  |
| FJ640909.1 | Myodes | glareolus |  |
| FJ640910.1 | Myodes | glareolus |  |
| FJ640911.1 | Myodes | glareolus |  |
| FJ640912.1 | Myodes | glareolus |  |
| FJ640913.1 | Myodes | glareolus |  |
| FJ640914.1 | Myodes | glareolus |  |
| FJ640915.1 | Myodes | glareolus |  |
| FJ640916.1 | Myodes | glareolus |  |
| FJ640917.1 | Myodes | glareolus |  |
| FJ640918.1 | Myodes | glareolus |  |
| FJ640919.1 | Myodes | glareolus |  |
| FJ640920.1 | Myodes | glareolus |  |
| FJ640921.1 | Myodes | glareolus |  |
| FJ640922.1 | Myodes | glareolus |  |
| FJ640923.1 | Myodes | glareolus |  |
| FJ640924.1 | Myodes | glareolus |  |
| FJ640925.1 | Myodes | glareolus |  |
| FJ640926.1 | Myodes | glareolus |  |
| FJ640927.1 | Myodes | glareolus |  |
| FJ640928.1 | Myodes | glareolus |  |
| FJ640929.1 | Myodes | glareolus |  |
| FJ640930.1 | Myodes | glareolus |  |
| FJ640931.1 | Myodes | glareolus |  |
| FJ640932.1 | Myodes | glareolus |  |
| FJ640933.1 | Myodes | glareolus |  |
| FJ640934.1 | Myodes | glareolus |  |
| FJ640935.1 | Myodes | glareolus |  |
| FJ640936.1 | Myodes | glareolus |  |
| FJ640937.1 | Myodes | glareolus |  |
| FJ640938.1 | Myodes | glareolus |  |
| FJ640939.1 | Myodes | glareolus |  |
| FJ640940.1 | Myodes | glareolus |  |
| FJ640941.1 | Myodes | glareolus |  |
| FJ640942.1 | Myodes | glareolus |  |

|            |        |           |  |
|------------|--------|-----------|--|
| FJ640943.1 | Myodes | glareolus |  |
| FJ640944.1 | Myodes | glareolus |  |
| FJ640945.1 | Myodes | glareolus |  |
| FJ640946.1 | Myodes | glareolus |  |
| FJ640947.1 | Myodes | glareolus |  |
| FJ640952.1 | Myodes | glareolus |  |
| FJ640948.1 | Myodes | glareolus |  |
| FJ640953.1 | Myodes | glareolus |  |
| FJ640949.1 | Myodes | glareolus |  |
| EU483563.1 | Myodes | glareolus |  |
| EU483594.1 | Myodes | glareolus |  |
| EU483547.1 | Myodes | glareolus |  |
| EU483593.1 | Myodes | glareolus |  |
| EU483546.1 | Myodes | glareolus |  |
| EU483553.1 | Myodes | glareolus |  |
| EU483551.1 | Myodes | glareolus |  |
| EU483552.1 | Myodes | glareolus |  |
| EU483592.1 | Myodes | glareolus |  |
| EU483591.1 | Myodes | glareolus |  |
| EU483590.1 | Myodes | glareolus |  |
| EU483589.1 | Myodes | glareolus |  |
| EU483588.1 | Myodes | glareolus |  |
| EU483587.1 | Myodes | glareolus |  |
| EU483576.1 | Myodes | glareolus |  |
| EU483575.1 | Myodes | glareolus |  |
| EU483574.1 | Myodes | glareolus |  |
| EU483577.1 | Myodes | glareolus |  |
| EU483578.1 | Myodes | glareolus |  |
| EU483535.1 | Myodes | glareolus |  |
| EU483536.1 | Myodes | glareolus |  |
| EU483557.1 | Myodes | glareolus |  |
| EU483558.1 | Myodes | glareolus |  |
| EU483537.1 | Myodes | glareolus |  |
| EU483538.1 | Myodes | glareolus |  |
| EF408078.1 | Myodes | glareolus |  |
| EF408076.1 | Myodes | glareolus |  |
| EF408080.1 | Myodes | glareolus |  |
| EF408079.1 | Myodes | glareolus |  |
| EU483541.1 | Myodes | glareolus |  |
| EU483542.1 | Myodes | glareolus |  |
| EF408082.1 | Myodes | glareolus |  |
| EU483579.1 | Myodes | glareolus |  |
| EF408083.1 | Myodes | glareolus |  |
| EU483545.1 | Myodes | glareolus |  |

|            |        |            |  |
|------------|--------|------------|--|
| EU483519.1 | Myodes | glareolus  |  |
| EU483556.1 | Myodes | glareolus  |  |
| EU483540.1 | Myodes | glareolus  |  |
| EU483518.1 | Myodes | glareolus  |  |
| EF408069.1 | Myodes | glareolus  |  |
| EF408071.1 | Myodes | glareolus  |  |
| EU483586.1 | Myodes | glareolus  |  |
| EU483530.1 | Myodes | glareolus  |  |
| EU483534.1 | Myodes | glareolus  |  |
| EU483532.1 | Myodes | glareolus  |  |
| EU483533.1 | Myodes | glareolus  |  |
| EU483585.1 | Myodes | glareolus  |  |
| EU483584.1 | Myodes | glareolus  |  |
| EU483583.1 | Myodes | glareolus  |  |
| EU483582.1 | Myodes | glareolus  |  |
| EU483581.1 | Myodes | glareolus  |  |
| EU483580.1 | Myodes | glareolus  |  |
| EU483570.1 | Myodes | glareolus  |  |
| EU483569.1 | Myodes | glareolus  |  |
| EU483568.1 | Myodes | glareolus  |  |
| EU483561.1 | Myodes | glareolus  |  |
| EU483571.1 | Myodes | glareolus  |  |
| EU483567.1 | Myodes | glareolus  |  |
| EU483566.1 | Myodes | glareolus  |  |
| EU483565.1 | Myodes | glareolus  |  |
| EU483520.1 | Myodes | glareolus  |  |
| EU483521.1 | Myodes | glareolus  |  |
| EU483522.1 | Myodes | glareolus  |  |
| EU483523.1 | Myodes | glareolus  |  |
| EU483525.1 | Myodes | glareolus  |  |
| EU483529.1 | Myodes | glareolus  |  |
| EU483528.1 | Myodes | glareolus  |  |
| EU483526.1 | Myodes | glareolus  |  |
| EU483527.1 | Myodes | glareolus  |  |
| EU483554.1 | Myodes | glareolus  |  |
| EU483555.1 | Myodes | glareolus  |  |
| EU483548.1 | Myodes | glareolus  |  |
| EU483549.1 | Myodes | glareolus  |  |
| EU483550.1 | Myodes | glareolus  |  |
| DQ768151.1 | Myodes | glareolus  |  |
| EU349782.1 | Rattus | norvegicus |  |
| GU592980.1 | Rattus | norvegicus |  |
| GU592954.1 | Rattus | norvegicus |  |
| GU592955.1 | Rattus | norvegicus |  |

|            |        |            |  |
|------------|--------|------------|--|
| GU592956.1 | Rattus | norvegicus |  |
| GU592957.1 | Rattus | norvegicus |  |
| GU592958.1 | Rattus | norvegicus |  |
| GU592959.1 | Rattus | norvegicus |  |
| GU592960.1 | Rattus | norvegicus |  |
| GU592961.1 | Rattus | norvegicus |  |
| GU592962.1 | Rattus | norvegicus |  |
| GU592963.1 | Rattus | norvegicus |  |
| GU592964.1 | Rattus | norvegicus |  |
| GU592966.1 | Rattus | norvegicus |  |
| GU592967.1 | Rattus | norvegicus |  |
| GU592968.1 | Rattus | norvegicus |  |
| GU592979.1 | Rattus | norvegicus |  |
| GU592969.1 | Rattus | norvegicus |  |
| GU592970.1 | Rattus | norvegicus |  |
| GU592971.1 | Rattus | norvegicus |  |
| GU592975.1 | Rattus | norvegicus |  |
| GU592976.1 | Rattus | norvegicus |  |
| GU592977.1 | Rattus | norvegicus |  |
| GU592982.1 | Rattus | norvegicus |  |
| GU592983.1 | Rattus | norvegicus |  |
| GU592984.1 | Rattus | norvegicus |  |
| GU592985.1 | Rattus | norvegicus |  |
| HM222710.1 | Rattus | norvegicus |  |
| GU592986.1 | Rattus | norvegicus |  |
| GU592987.1 | Rattus | norvegicus |  |
| GU592988.1 | Rattus | norvegicus |  |
| GU592978.1 | Rattus | norvegicus |  |
| GU592989.1 | Rattus | norvegicus |  |
| GU592991.1 | Rattus | norvegicus |  |
| GU592992.1 | Rattus | norvegicus |  |
| GU592972.1 | Rattus | norvegicus |  |
| GU592973.1 | Rattus | norvegicus |  |
| GU592974.1 | Rattus | norvegicus |  |
| GU592993.1 | Rattus | norvegicus |  |
| GU592994.1 | Rattus | norvegicus |  |
| GU592981.1 | Rattus | norvegicus |  |
| GU592995.1 | Rattus | norvegicus |  |
| GU592990.1 | Rattus | norvegicus |  |
| GU592965.1 | Rattus | norvegicus |  |
| GU592996.1 | Rattus | norvegicus |  |
| GU592997.1 | Rattus | norvegicus |  |
| AB355902.1 | Rattus | norvegicus |  |
| AB355903.1 | Rattus | norvegicus |  |

|            |         |            |  |
|------------|---------|------------|--|
| AB033713.1 | Rattus  | norvegicus |  |
| HM217370.1 | Rattus  | norvegicus |  |
| HM217429.1 | Rattus  | norvegicus |  |
| HM217481.1 | Rattus  | norvegicus |  |
| AB211039.1 | Rattus  | rattus     |  |
| AB033702.1 | Rattus  | rattus     |  |
| HM217368.1 | Rattus  | rattus     |  |
| HM217366.1 | Rattus  | rattus     |  |
| HM217367.1 | Rattus  | rattus     |  |
| AB292679.1 | Sciurus | vulgaris   |  |
| AB292680.1 | Sciurus | vulgaris   |  |
| AB292681.1 | Sciurus | vulgaris   |  |
| AB030028.1 | Sciurus | vulgaris   |  |
| AB030027.1 | Sciurus | vulgaris   |  |
| AB030026.1 | Sciurus | vulgaris   |  |
| AB015083.1 | Sus     | scrofa     |  |
| AB015082.1 | Sus     | scrofa     |  |
| AB015078.1 | Sus     | scrofa     |  |
| AB015075.1 | Sus     | scrofa     |  |
| AB015074.1 | Sus     | scrofa     |  |
| AB015070.1 | Sus     | scrofa     |  |
| AB015069.1 | Sus     | scrofa     |  |
| AB015068.1 | Sus     | scrofa     |  |
| AB015066.1 | Sus     | scrofa     |  |
| AM492566.2 | Sus     | scrofa     |  |
| AM492605.2 | Sus     | scrofa     |  |
| AM492628.2 | Sus     | scrofa     |  |
| AM492607.2 | Sus     | scrofa     |  |
| AM492606.1 | Sus     | scrofa     |  |
| AM492624.1 | Sus     | scrofa     |  |
| AM492623.1 | Sus     | scrofa     |  |
| AM492622.1 | Sus     | scrofa     |  |
| AM492621.1 | Sus     | scrofa     |  |
| AM492620.1 | Sus     | scrofa     |  |
| AM492619.1 | Sus     | scrofa     |  |
| D34635.1   | Bos     | taurus     |  |
| DQ186222.1 | Bos     | taurus     |  |
| DQ186213.1 | Bos     | taurus     |  |
| DQ186289.1 | Bos     | taurus     |  |
| DQ186283.1 | Bos     | taurus     |  |
| DQ186279.1 | Bos     | taurus     |  |
| DQ186265.1 | Bos     | taurus     |  |
| DQ186263.1 | Bos     | taurus     |  |
| DQ186260.1 | Bos     | taurus     |  |

|            |        |        |  |
|------------|--------|--------|--|
| DQ186259.1 | Bos    | taurus |  |
| DQ186254.1 | Bos    | taurus |  |
| DQ186253.1 | Bos    | taurus |  |
| DQ186252.1 | Bos    | taurus |  |
| DQ186245.1 | Bos    | taurus |  |
| DQ186242.1 | Bos    | taurus |  |
| DQ186233.1 | Bos    | taurus |  |
| DQ186228.1 | Bos    | taurus |  |
| DQ186212.1 | Bos    | taurus |  |
| DQ186211.1 | Bos    | taurus |  |
| DQ186209.1 | Bos    | taurus |  |
| D84205.1   | Ovis   | aries  |  |
| AB006800.1 | Ovis   | aries  |  |
| D84201.1   | Capra  | hircus |  |
| AB004075.1 | Capra  | hircus |  |
| AB004074.1 | Capra  | hircus |  |
| AB004073.1 | Capra  | hircus |  |
| AB004071.1 | Capra  | hircus |  |
| AB004070.1 | Capra  | hircus |  |
| AB004072.1 | Capra  | hircus |  |
| DQ093614.1 | Capra  | hircus |  |
| AB110597.1 | Capra  | hircus |  |
| AB110596.1 | Capra  | hircus |  |
| DQ073048.1 | Capra  | hircus |  |
| FJ556564.1 | Capra  | hircus |  |
| AB736144.1 | Capra  | hircus |  |
| AB736131.1 | Capra  | hircus |  |
| EU130775.1 | Capra  | hircus |  |
| DQ514546.1 | Capra  | hircus |  |
| DQ089480.1 | Capra  | hircus |  |
| DQ089476.1 | Capra  | hircus |  |
| AB044986.1 | Gallus | gallus |  |
| AB044987.1 | Gallus | gallus |  |
| AB044985.1 | Gallus | gallus |  |
| AF153499.1 | Gallus | gallus |  |
| AF354171.1 | Gallus | gallus |  |
| AF195631.1 | Gallus | gallus |  |
| AF195630.1 | Gallus | gallus |  |
| AF195629.1 | Gallus | gallus |  |
| AF195628.1 | Gallus | gallus |  |
| AF028795.1 | Gallus | gallus |  |
| AB044984.1 | Gallus | gallus |  |
| AY029583.1 | Gallus | gallus |  |
| AY029582.1 | Gallus | gallus |  |

|             |         |           |  |
|-------------|---------|-----------|--|
| AF119093.1  | Gallus  | gallus    |  |
| AF102874.1  | Gallus  | gallus    |  |
| AF362406.1  | Gallus  | gallus    |  |
| AY026059.1  | Gallus  | gallus    |  |
| >GQ120440.1 | Anser   | anser     |  |
| EU585613.1  | Anser   | anser     |  |
| AY552162.1  | Anser   | cygnoides |  |
| AY552165.1  | Anser   | cygnoides |  |
| AY552164.1  | Anser   | cygnoides |  |
| AY552163.1  | Anser   | cygnoides |  |
| EU585616.1  | Anser   | cygnoides |  |
| EU863202.1  | Anser   | cygnoides |  |
| EU863201.1  | Anser   | cygnoides |  |
| AY552162.1  | Anser   | cygnoides |  |
| AY552165.1  | Anser   | cygnoides |  |
| AY552164.1  | Anser   | cygnoides |  |
| AY552163.1  | Anser   | cygnoides |  |
| EU585616.1  | Anser   | cygnoides |  |
| EU863202.1  | Anser   | cygnoides |  |
| EU863201.1  | Anser   | cygnoides |  |
| EU492281.1  | Salmo   | salar     |  |
| BT044011.1  | Salmo   | salar     |  |
| AF053591.1  | Salmo   | salar     |  |
| FJ435619.1  | Salmo   | salar     |  |
| EU492280.1  | Salmo   | salar     |  |
| EF584212.1  | Salmo   | salar     |  |
| FJ435620.1  | Salmo   | salar     |  |
| FJ435618.1  | Salmo   | salar     |  |
| AF202032.1  | Salmo   | salar     |  |
| AF059098.1  | Cairina | moschata  |  |
